# Supplementary material for: Maps of Open Chromatin Guide the Functional Follow-Up of Genome-Wide Association Signals: Application to Hematological Traits
Source: PubMed Central journal article supplement (PMC3128100; doi:10.1371/journal.pgen.1002139), 2011-06-30

**(A) FLJ36031-PIK3CG**

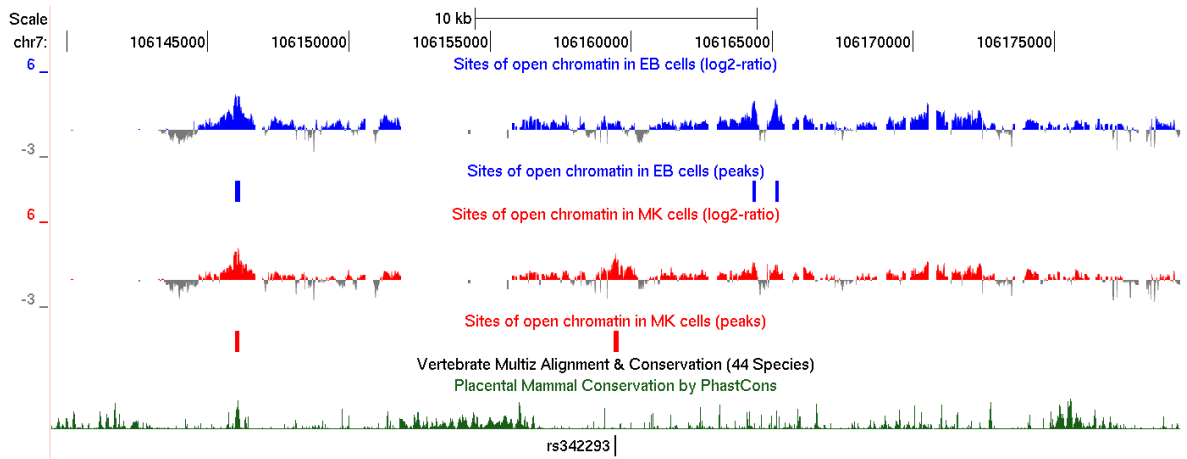

**(B) DNMT3**

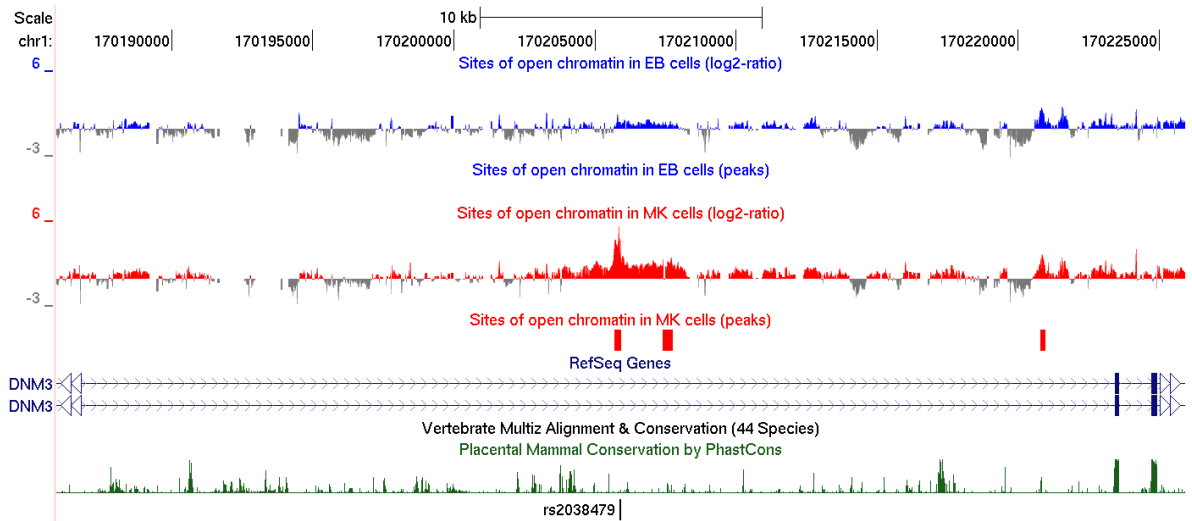

**(C) HBS1L-MYB**

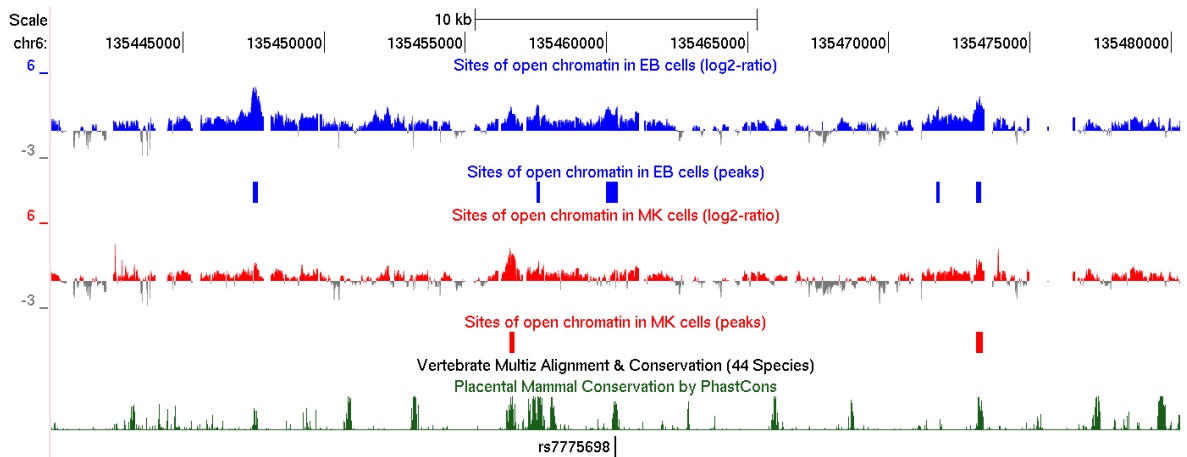

**(D) PEAR1**

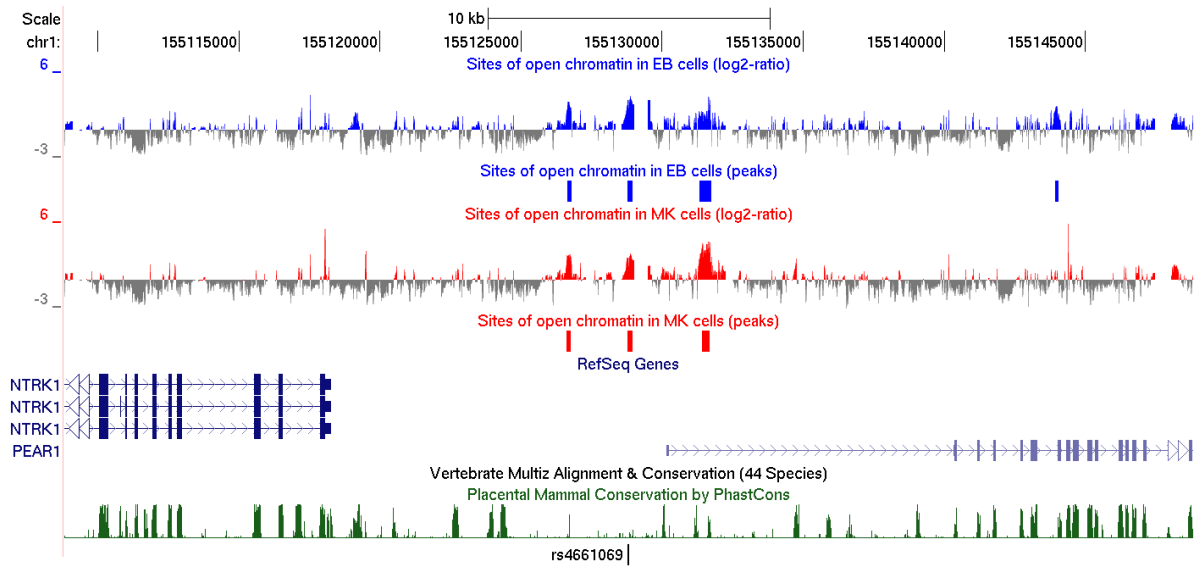

**(E) RAF1**

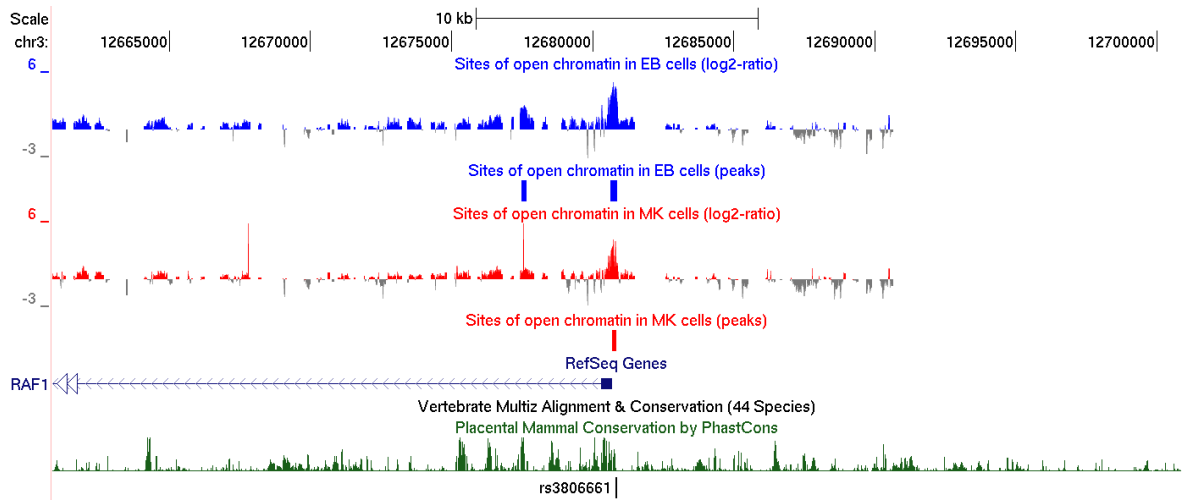

**(F) TMCC2**

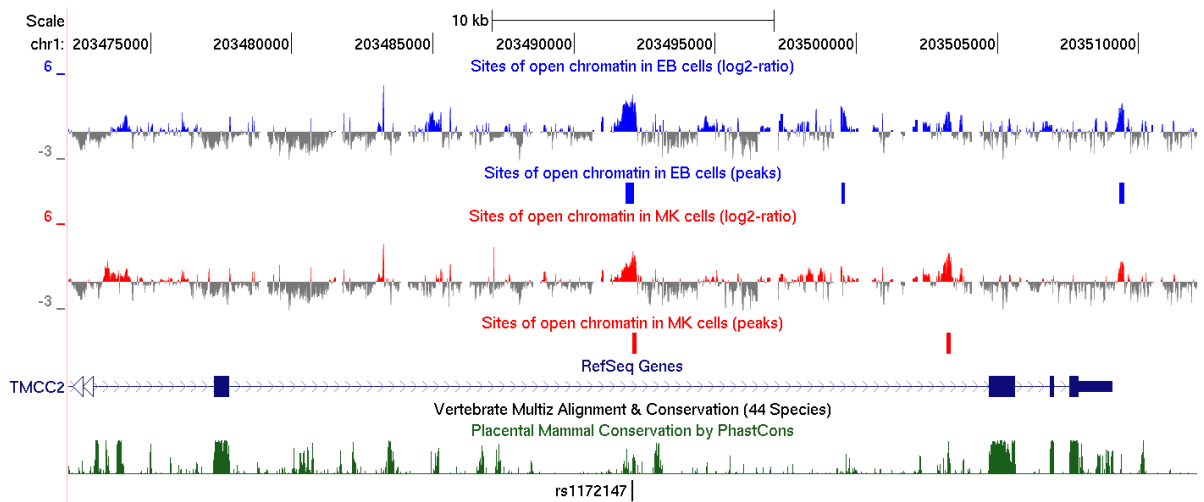

**(G) CYP17A1–C10orf32**

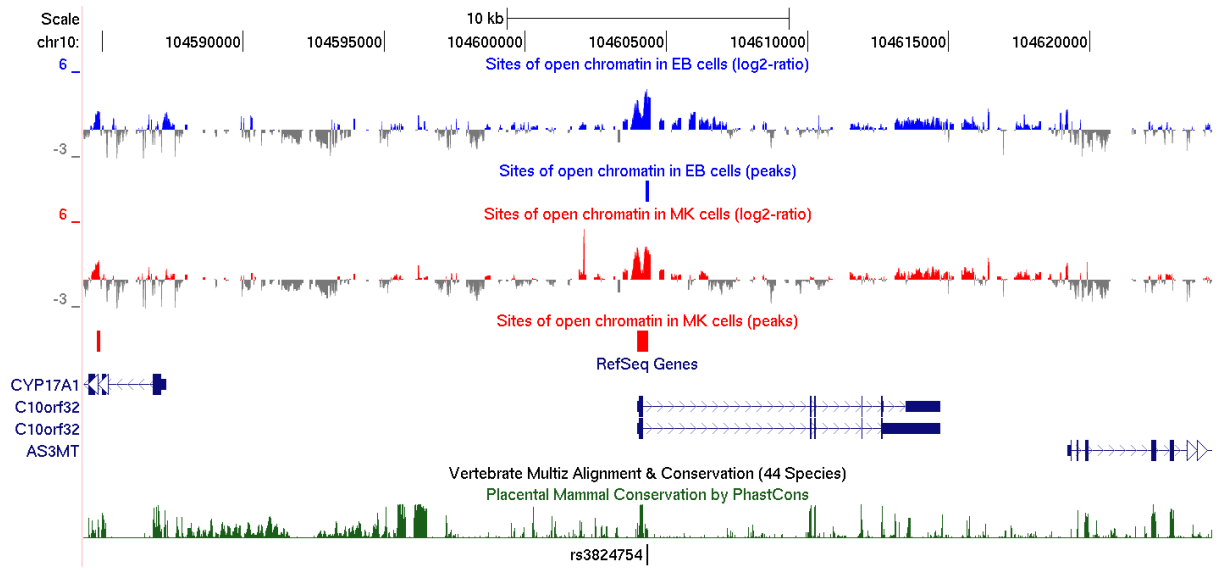

Supplement: pgen.1002139.s004.pdf [file pgen.1002139.s004.pdf]
