# Supplementary material for: Maps of Open Chromatin Guide the Functional Follow-Up of Genome-Wide Association Signals: Application to Hematological Traits
Source: PubMed Central journal article supplement (PMC3128100; doi:10.1371/journal.pgen.1002139), 2011-06-30
Supplement: pgen.1002139.s008.pdf [file pgen.1002139.s008.pdf]

**Table S1. FAIRE peak data sets.**

| <b>(A) Association loci</b> |           |                      |                  |             |             |
|-----------------------------|-----------|----------------------|------------------|-------------|-------------|
| #                           | Cell type | Gene locus           | Genomic position |             |             |
|                             |           |                      | Chromosome       | Start       | End         |
| 1                           | MK        | VAV3                 | 1                | 107,914,840 | 107,915,135 |
| 2                           | MK        | CELSR2, PSRC1, SORT1 | 1                | 109,537,919 | 109,538,062 |
| 3                           | MK        | CELSR2, PSRC1, SORT1 | 1                | 109,557,893 | 109,558,576 |
| 4                           | MK        | CELSR2, PSRC1, SORT1 | 1                | 109,562,771 | 109,563,006 |
| 5                           | MK        | CELSR2, PSRC1, SORT1 | 1                | 109,593,505 | 109,594,216 |
| 6                           | MK        | CELSR2, PSRC1, SORT1 | 1                | 109,627,258 | 109,627,475 |
| 7                           | MK        | CELSR2, PSRC1, SORT1 | 1                | 109,660,767 | 109,660,957 |
| 8                           | MK        | CELSR2, PSRC1, SORT1 | 1                | 109,664,465 | 109,664,672 |
| 9                           | MK        | CELSR2, PSRC1, SORT1 | 1                | 109,714,935 | 109,715,078 |
| 10                          | MK        | CELSR2, PSRC1, SORT1 | 1                | 109,734,038 | 109,734,237 |
| 11                          | MK        | CELSR2, PSRC1, SORT1 | 1                | 109,734,968 | 109,735,126 |
| 12                          | MK        | PEAR1                | 1                | 155,102,735 | 155,102,938 |
| 13                          | MK        | PEAR1                | 1                | 155,126,625 | 155,126,793 |
| 14                          | MK        | PEAR1                | 1                | 155,128,772 | 155,128,965 |
| 15                          | MK        | PEAR1                | 1                | 155,131,394 | 155,131,731 |
| 16                          | MK        | PEAR1                | 1                | 155,194,762 | 155,194,983 |
| 17                          | MK        | FCER1G               | 1                | 159,451,530 | 159,451,747 |
| 18                          | MK        | FCER1G               | 1                | 159,453,843 | 159,454,060 |
| 19                          | MK        | FCER1G               | 1                | 159,462,115 | 159,462,448 |
| 20                          | MK        | FCER1G               | 1                | 159,463,886 | 159,464,219 |
| 21                          | MK        | DNM3                 | 1                | 170,184,382 | 170,184,657 |
| 22                          | MK        | DNM3                 | 1                | 170,205,693 | 170,205,939 |
| 23                          | MK        | DNM3                 | 1                | 170,207,408 | 170,207,753 |
| 24                          | MK        | DNM3                 | 1                | 170,220,764 | 170,220,954 |
| 25                          | MK        | DNM3                 | 1                | 170,238,612 | 170,238,785 |
| 26                          | MK        | DNM3                 | 1                | 170,239,997 | 170,240,212 |
| 27                          | MK        | DNM3                 | 1                | 170,246,245 | 170,246,374 |
| 28                          | MK        | DNM3                 | 1                | 170,345,175 | 170,345,373 |
| 29                          | MK        | TMCC2                | 1                | 203,447,052 | 203,447,525 |
| 30                          | MK        | TMCC2                | 1                | 203,463,544 | 203,463,663 |
| 31                          | MK        | TMCC2                | 1                | 203,492,061 | 203,492,206 |
| 32                          | MK        | TMCC2                | 1                | 203,503,192 | 203,503,337 |
| 33                          | MK        | TMCC2                | 1                | 203,524,084 | 203,524,303 |
| 34                          | MK        | MIA3                 | 1                | 220,683,640 | 220,683,839 |
| 35                          | MK        | MIA3                 | 1                | 220,695,158 | 220,695,367 |
| 36                          | MK        | MIA3                 | 1                | 220,704,890 | 220,705,039 |
| 37                          | MK        | MIA3                 | 1                | 220,705,566 | 220,706,004 |
| 38                          | MK        | MIA3                 | 1                | 220,829,860 | 220,830,153 |
| 39                          | MK        | MIA3                 | 1                | 220,857,748 | 220,857,865 |
| 40                          | MK        | MIA3                 | 1                | 220,874,539 | 220,874,712 |

|    |    |                |   |             |             |
|----|----|----------------|---|-------------|-------------|
| 41 | MK | <i>MIA3</i>    | 1 | 220,881,541 | 220,881,708 |
| 42 | MK | <i>MIA3</i>    | 1 | 220,884,113 | 220,884,324 |
| 43 | MK | <i>MIA3</i>    | 1 | 220,894,985 | 220,895,158 |
| 44 | MK | <i>MIA3</i>    | 1 | 220,895,763 | 220,895,936 |
| 45 | MK | <i>MIA3</i>    | 1 | 220,951,347 | 220,951,492 |
| 46 | MK | <i>MIA3</i>    | 1 | 220,952,425 | 220,952,565 |
| 47 | MK | <i>MIA3</i>    | 1 | 220,952,756 | 220,953,397 |
| 48 | MK | <i>MIA3</i>    | 1 | 221,013,036 | 221,013,171 |
| 49 | MK | <i>MIA3</i>    | 1 | 221,054,903 | 221,055,115 |
| 50 | MK | <i>EHD3</i>    | 2 | 31,310,233  | 31,310,426  |
| 51 | MK | <i>EHD3</i>    | 2 | 31,312,109  | 31,312,250  |
| 52 | MK | <i>EHD3</i>    | 2 | 31,313,350  | 31,313,549  |
| 53 | MK | <i>EHD3</i>    | 2 | 31,316,040  | 31,316,233  |
| 54 | MK | <i>STK39</i>   | 2 | 168,701,192 | 168,701,417 |
| 55 | MK | <i>WDR12</i>   | 2 | 203,444,209 | 203,444,704 |
| 56 | MK | <i>WDR12</i>   | 2 | 203,484,606 | 203,484,932 |
| 57 | MK | <i>WDR12</i>   | 2 | 203,485,121 | 203,485,242 |
| 58 | MK | <i>ITPR1</i>   | 3 | 4,789,003   | 4,789,189   |
| 59 | MK | <i>ITPR1</i>   | 3 | 4,823,523   | 4,823,700   |
| 60 | MK | <i>ITPR1</i>   | 3 | 4,847,909   | 4,848,262   |
| 61 | MK | <i>ITPR1</i>   | 3 | 4,851,141   | 4,851,312   |
| 62 | MK | <i>ITPR1</i>   | 3 | 4,852,491   | 4,852,736   |
| 63 | MK | <i>ITPR1</i>   | 3 | 4,853,989   | 4,854,492   |
| 64 | MK | <i>RAF1</i>    | 3 | 12,680,681  | 12,680,868  |
| 65 | MK | <i>ARHGEF3</i> | 3 | 56,765,356  | 56,765,495  |
| 66 | MK | <i>ARHGEF3</i> | 3 | 56,793,061  | 56,793,222  |
| 67 | MK | <i>ARHGEF3</i> | 3 | 56,799,422  | 56,799,589  |
| 68 | MK | <i>ARHGEF3</i> | 3 | 56,808,646  | 56,808,811  |
| 69 | MK | <i>ARHGEF3</i> | 3 | 56,810,974  | 56,811,195  |
| 70 | MK | <i>ARHGEF3</i> | 3 | 56,824,732  | 56,824,917  |
| 71 | MK | <i>ARHGEF3</i> | 3 | 56,865,019  | 56,865,132  |
| 72 | MK | <i>MRAS</i>    | 3 | 139,550,152 | 139,550,443 |
| 73 | MK | <i>P2RY12</i>  | 3 | 152,428,299 | 152,428,498 |
| 74 | MK | <i>P2RY12</i>  | 3 | 152,478,861 | 152,479,030 |
| 75 | MK | <i>P2RY12</i>  | 3 | 152,483,531 | 152,483,685 |
| 76 | MK | <i>P2RY12</i>  | 3 | 152,484,566 | 152,484,761 |
| 77 | MK | <i>ITGA2</i>   | 5 | 52,280,195  | 52,280,370  |
| 78 | MK | <i>ITGA2</i>   | 5 | 52,320,783  | 52,321,224  |
| 79 | MK | <i>ITGA2</i>   | 5 | 52,384,112  | 52,384,247  |
| 80 | MK | <i>ITGA2</i>   | 5 | 52,384,726  | 52,384,848  |
| 81 | MK | <i>ITGA2</i>   | 5 | 52,427,696  | 52,427,819  |
| 82 | MK | <i>PHACTR1</i> | 6 | 13,002,199  | 13,002,360  |
| 83 | MK | <i>PHACTR1</i> | 6 | 13,019,720  | 13,019,888  |
| 84 | MK | <i>PHACTR1</i> | 6 | 13,049,651  | 13,049,938  |
| 85 | MK | <i>PHACTR1</i> | 6 | 13,053,344  | 13,053,593  |

|     |    |                            |   |             |             |
|-----|----|----------------------------|---|-------------|-------------|
| 86  | MK | <i>PHACTR1</i>             | 6 | 13,055,492  | 13,056,072  |
| 87  | MK | <i>HFE</i>                 | 6 | 26,205,599  | 26,205,740  |
| 88  | MK | <i>HFE</i>                 | 6 | 26,211,949  | 26,212,141  |
| 89  | MK | <i>HFE</i>                 | 6 | 26,231,260  | 26,231,461  |
| 90  | MK | <i>HFE</i>                 | 6 | 26,232,120  | 26,232,359  |
| 91  | MK | <i>HFE</i>                 | 6 | 26,234,394  | 26,234,537  |
| 92  | MK | <i>BAK1</i>                | 6 | 33,647,044  | 33,647,233  |
| 93  | MK | <i>BAK1</i>                | 6 | 33,655,957  | 33,656,142  |
| 94  | MK | <i>BAK1</i>                | 6 | 33,661,450  | 33,661,691  |
| 95  | MK | <i>MAPK14</i>              | 6 | 36,103,320  | 36,103,575  |
| 96  | MK | <i>MAPK14</i>              | 6 | 36,104,608  | 36,104,824  |
| 97  | MK | <i>MAPK14</i>              | 6 | 36,171,002  | 36,171,191  |
| 98  | MK | <i>MAPK14</i>              | 6 | 36,175,109  | 36,175,320  |
| 99  | MK | <i>MAPK14</i>              | 6 | 36,194,392  | 36,194,563  |
| 100 | MK | <i>MAPK14</i>              | 6 | 36,207,508  | 36,207,723  |
| 101 | MK | <i>BSYL, CCND3</i>         | 6 | 41,996,743  | 41,997,270  |
| 102 | MK | <i>BSYL, CCND3</i>         | 6 | 42,011,971  | 42,012,241  |
| 103 | MK | <i>BSYL, CCND3</i>         | 6 | 42,013,961  | 42,014,170  |
| 104 | MK | <i>BSYL, CCND3</i>         | 6 | 42,015,207  | 42,015,420  |
| 105 | MK | <i>BSYL, CCND3</i>         | 6 | 42,016,385  | 42,016,594  |
| 106 | MK | <i>BSYL, CCND3</i>         | 6 | 42,017,537  | 42,017,826  |
| 107 | MK | <i>BSYL, CCND3</i>         | 6 | 42,093,014  | 42,093,153  |
| 108 | MK | <i>BSYL, CCND3</i>         | 6 | 42,104,341  | 42,104,544  |
| 109 | MK | <i>HBS1L, MYB</i>          | 6 | 135,417,607 | 135,417,890 |
| 110 | MK | <i>HBS1L, MYB</i>          | 6 | 135,456,516 | 135,456,779 |
| 111 | MK | <i>HBS1L, MYB</i>          | 6 | 135,491,460 | 135,491,619 |
| 112 | MK | <i>HBS1L, MYB</i>          | 6 | 135,507,891 | 135,508,040 |
| 113 | MK | <i>HBS1L, MYB</i>          | 6 | 135,543,853 | 135,544,170 |
| 114 | MK | <i>HBS1L, MYB</i>          | 6 | 135,554,328 | 135,554,777 |
| 115 | MK | <i>HBS1L, MYB</i>          | 6 | 135,572,627 | 135,573,056 |
| 116 | MK | <i>HBS1L, MYB</i>          | 6 | 135,575,418 | 135,575,559 |
| 117 | MK | <i>MTHFD1L</i>             | 6 | 151,228,401 | 151,228,738 |
| 118 | MK | <i>MTHFD1L</i>             | 6 | 151,254,856 | 151,254,996 |
| 119 | MK | <i>SLC22A3, LPAL2, LPA</i> | 6 | 160,797,077 | 160,797,244 |
| 120 | MK | <i>SLC22A3, LPAL2, LPA</i> | 6 | 160,803,572 | 160,803,737 |
| 121 | MK | <i>SLC22A3, LPAL2, LPA</i> | 6 | 160,861,000 | 160,861,377 |
| 122 | MK | <i>CD36</i>                | 7 | 80,126,768  | 80,126,956  |
| 123 | MK | <i>FLJ36031, PIK3CG</i>    | 7 | 106,088,749 | 106,088,894 |
| 124 | MK | <i>FLJ36031, PIK3CG</i>    | 7 | 106,145,952 | 106,146,128 |
| 125 | MK | <i>FLJ36031, PIK3CG</i>    | 7 | 106,159,393 | 106,159,887 |
| 126 | MK | <i>AK3, RCL1, JAK2</i>     | 9 | 4,731,175   | 4,731,296   |
| 127 | MK | <i>AK3, RCL1, JAK2</i>     | 9 | 4,740,131   | 4,740,474   |
| 128 | MK | <i>AK3, RCL1, JAK2</i>     | 9 | 4,749,443   | 4,749,608   |
| 129 | MK | <i>AK3, RCL1, JAK2</i>     | 9 | 4,752,645   | 4,752,818   |
| 130 | MK | <i>AK3, RCL1, JAK2</i>     | 9 | 4,782,722   | 4,782,987   |

|     |    |                      |    |             |             |
|-----|----|----------------------|----|-------------|-------------|
| 131 | MK | AK3, RCL1, JAK2      | 9  | 4,787,876   | 4,788,040   |
| 132 | MK | AK3, RCL1, JAK2      | 9  | 4,788,379   | 4,788,594   |
| 133 | MK | AK3, RCL1, JAK2      | 9  | 4,789,900   | 4,790,089   |
| 134 | MK | AK3, RCL1, JAK2      | 9  | 4,975,107   | 4,975,244   |
| 135 | MK | AK3, RCL1, JAK2      | 9  | 4,978,008   | 4,978,177   |
| 136 | MK | CACNB2               | 10 | 18,608,247  | 18,608,466  |
| 137 | MK | CACNB2               | 10 | 18,747,666  | 18,747,838  |
| 138 | MK | CXCL12               | 10 | 44,027,150  | 44,027,346  |
| 139 | MK | CXCL12               | 10 | 44,131,962  | 44,132,213  |
| 140 | MK | JMJD1C               | 10 | 64,588,027  | 64,588,162  |
| 141 | MK | JMJD1C               | 10 | 64,596,656  | 64,596,856  |
| 142 | MK | JMJD1C               | 10 | 64,646,953  | 64,647,146  |
| 143 | MK | JMJD1C               | 10 | 64,686,249  | 64,686,361  |
| 144 | MK | JMJD1C               | 10 | 64,694,919  | 64,695,102  |
| 145 | MK | JMJD1C               | 10 | 64,697,313  | 64,697,676  |
| 146 | MK | JMJD1C               | 10 | 64,698,979  | 64,699,230  |
| 147 | MK | JMJD1C               | 10 | 64,818,293  | 64,818,410  |
| 148 | MK | CYP17A1              | 10 | 104,525,551 | 104,525,930 |
| 149 | MK | CYP17A1              | 10 | 104,530,963 | 104,531,222 |
| 150 | MK | CYP17A1              | 10 | 104,546,243 | 104,546,420 |
| 151 | MK | CYP17A1              | 10 | 104,584,763 | 104,584,934 |
| 152 | MK | CYP17A1              | 10 | 104,603,961 | 104,604,344 |
| 153 | MK | CYP17A1              | 10 | 104,651,251 | 104,651,444 |
| 154 | MK | CYP17A1              | 10 | 104,667,304 | 104,668,027 |
| 155 | MK | CYP17A1              | 10 | 104,677,523 | 104,677,686 |
| 156 | MK | BET1L, SIRT3, PSMD13 | 11 | 192,159     | 192,360     |
| 157 | MK | BET1L, SIRT3, PSMD13 | 11 | 197,413     | 197,708     |
| 158 | MK | BET1L, SIRT3, PSMD13 | 11 | 198,637     | 198,838     |
| 159 | MK | BET1L, SIRT3, PSMD13 | 11 | 210,615     | 210,739     |
| 160 | MK | BET1L, SIRT3, PSMD13 | 11 | 226,313     | 227,021     |
| 161 | MK | PLEKHA7              | 11 | 16,798,523  | 16,798,666  |
| 162 | MK | PLEKHA7              | 11 | 16,835,449  | 16,835,666  |
| 163 | MK | PLEKHA7              | 11 | 16,861,395  | 16,861,589  |
| 164 | MK | PLEKHA7              | 11 | 16,914,078  | 16,914,254  |
| 165 | MK | ATP2B1               | 12 | 88,626,699  | 88,627,268  |
| 166 | MK | ATP2B1               | 12 | 88,627,333  | 88,627,650  |
| 167 | MK | SH2B3/LNK, ATXN2     | 12 | 110,319,239 | 110,319,601 |
| 168 | MK | SH2B3/LNK, ATXN2     | 12 | 110,327,583 | 110,327,960 |
| 169 | MK | SH2B3/LNK, ATXN2     | 12 | 110,331,748 | 110,332,468 |
| 170 | MK | SH2B3/LNK, ATXN2     | 12 | 110,351,039 | 110,351,324 |
| 171 | MK | SH2B3/LNK, ATXN2     | 12 | 110,352,457 | 110,352,655 |
| 172 | MK | SH2B3/LNK, ATXN2     | 12 | 110,360,147 | 110,360,284 |
| 173 | MK | SH2B3/LNK, ATXN2     | 12 | 110,360,817 | 110,360,964 |
| 174 | MK | SH2B3/LNK, ATXN2     | 12 | 110,373,957 | 110,374,307 |
| 175 | MK | SH2B3/LNK, ATXN2     | 12 | 110,519,271 | 110,519,681 |

|     |    |                             |    |             |             |
|-----|----|-----------------------------|----|-------------|-------------|
| 176 | MK | <i>SH2B3/LNK, ATXN2</i>     | 12 | 110,521,427 | 110,521,891 |
| 177 | MK | <i>SH2B3/LNK, ATXN2</i>     | 12 | 110,557,836 | 110,558,035 |
| 178 | MK | <i>SH2B3/LNK, ATXN2</i>     | 12 | 110,558,924 | 110,559,089 |
| 179 | MK | <i>PTPN11</i>               | 12 | 111,331,727 | 111,331,918 |
| 180 | MK | <i>PTPN11</i>               | 12 | 111,333,831 | 111,333,958 |
| 181 | MK | <i>PTPN11</i>               | 12 | 111,341,030 | 111,341,279 |
| 182 | MK | <i>PTPN11</i>               | 12 | 111,369,425 | 111,369,580 |
| 183 | MK | <i>TBX3, TBX5</i>           | 12 | 113,844,268 | 113,844,407 |
| 184 | MK | <i>TBX3, TBX5</i>           | 12 | 113,923,933 | 113,924,094 |
| 185 | MK | <i>HNF1A/TCF1, C12orf43</i> | 12 | 119,894,071 | 119,894,229 |
| 186 | MK | <i>HNF1A/TCF1, C12orf43</i> | 12 | 119,938,622 | 119,938,801 |
| 187 | MK | <i>HNF1A/TCF1, C12orf43</i> | 12 | 119,968,834 | 119,969,061 |
| 188 | MK | <i>WDR66</i>                | 12 | 120,761,849 | 120,762,094 |
| 189 | MK | <i>WDR66</i>                | 12 | 120,810,848 | 120,811,065 |
| 190 | MK | <i>WDR66</i>                | 12 | 120,840,714 | 120,840,925 |
| 191 | MK | <i>TPM1</i>                 | 15 | 61,121,690  | 61,121,873  |
| 192 | MK | <i>TPM1</i>                 | 15 | 61,127,403  | 61,127,604  |
| 193 | MK | <i>TPM1</i>                 | 15 | 61,129,502  | 61,129,701  |
| 194 | MK | <i>TPM1</i>                 | 15 | 61,130,635  | 61,130,867  |
| 195 | MK | <i>TPM1</i>                 | 15 | 61,142,689  | 61,142,866  |
| 196 | MK | <i>TPM1</i>                 | 15 | 61,155,658  | 61,155,927  |
| 197 | MK | <i>TPM1</i>                 | 15 | 61,158,766  | 61,158,953  |
| 198 | MK | <i>SMAD3</i>                | 15 | 65,160,616  | 65,160,775  |
| 199 | MK | <i>SMAD3</i>                | 15 | 65,170,713  | 65,170,888  |
| 200 | MK | <i>SMAD3</i>                | 15 | 65,177,832  | 65,178,049  |
| 201 | MK | <i>SMAD3</i>                | 15 | 65,189,105  | 65,189,412  |
| 202 | MK | <i>SMAD3</i>                | 15 | 65,237,270  | 65,237,461  |
| 203 | MK | <i>SMAD3</i>                | 15 | 65,287,173  | 65,287,445  |
| 204 | MK | <i>SMAD3</i>                | 15 | 65,334,097  | 65,334,248  |
| 205 | MK | <i>CSK, ULK3</i>            | 15 | 72,856,637  | 72,856,998  |
| 206 | MK | <i>CSK, ULK3</i>            | 15 | 72,859,620  | 72,859,806  |
| 207 | MK | <i>CSK, ULK3</i>            | 15 | 72,866,958  | 72,867,531  |
| 208 | MK | <i>CSK, ULK3</i>            | 15 | 72,922,603  | 72,922,794  |
| 209 | MK | <i>CSK, ULK3</i>            | 15 | 72,947,549  | 72,947,718  |
| 210 | MK | <i>CSK, ULK3</i>            | 15 | 72,949,446  | 72,949,723  |
| 211 | MK | <i>CSK, ULK3</i>            | 15 | 72,952,371  | 72,952,532  |
| 212 | MK | <i>CSK, ULK3</i>            | 15 | 72,969,303  | 72,969,478  |
| 213 | MK | <i>CSK, ULK3</i>            | 15 | 72,986,202  | 72,986,345  |
| 214 | MK | <i>CSK, ULK3</i>            | 15 | 73,017,434  | 73,017,675  |
| 215 | MK | <i>MAP2K4</i>               | 17 | 11,864,740  | 11,865,023  |
| 216 | MK | <i>TAOK1</i>                | 17 | 24,721,381  | 24,721,534  |
| 217 | MK | <i>TAOK1</i>                | 17 | 24,741,338  | 24,741,554  |
| 218 | MK | <i>TAOK1</i>                | 17 | 24,813,063  | 24,813,280  |
| 219 | MK | <i>TAOK1</i>                | 17 | 24,888,222  | 24,888,373  |
| 220 | MK | <i>TAOK1</i>                | 17 | 24,919,622  | 24,919,734  |

|     |    |                             |    |             |             |
|-----|----|-----------------------------|----|-------------|-------------|
| 221 | MK | <i>GSDMA, ORMDL3</i>        | 17 | 35,337,403  | 35,337,552  |
| 222 | MK | <i>GSDMA, ORMDL3</i>        | 17 | 35,362,633  | 35,363,258  |
| 223 | MK | <i>GSDMA, ORMDL3</i>        | 17 | 35,368,822  | 35,369,018  |
| 224 | MK | <i>GSDMA, ORMDL3</i>        | 17 | 35,382,108  | 35,382,315  |
| 225 | MK | <i>CD226</i>                | 18 | 65,657,414  | 65,657,608  |
| 226 | MK | <i>CD226</i>                | 18 | 65,684,550  | 65,684,718  |
| 227 | MK | <i>CD226</i>                | 18 | 65,716,914  | 65,717,089  |
| 228 | MK | <i>MAP2K2</i>               | 19 | 4,040,110   | 4,040,611   |
| 229 | MK | <i>MAP2K2</i>               | 19 | 4,075,128   | 4,075,297   |
| 230 | MK | <i>LDLR</i>                 | 19 | 11,060,982  | 11,061,167  |
| 231 | MK | <i>LDLR</i>                 | 19 | 11,061,950  | 11,062,244  |
| 232 | MK | <i>AKT2</i>                 | 19 | 45,419,804  | 45,419,969  |
| 233 | MK | <i>AKT2</i>                 | 19 | 45,483,138  | 45,483,327  |
| 234 | MK | <i>AKT2</i>                 | 19 | 45,491,966  | 45,492,158  |
| 235 | MK | <i>AKT2</i>                 | 19 | 45,503,197  | 45,503,389  |
| 236 | MK | <i>APOC1, APOC4, APOE</i>   | 19 | 50,041,184  | 50,041,401  |
| 237 | MK | <i>APOC1, APOC4, APOE</i>   | 19 | 50,051,484  | 50,051,995  |
| 238 | MK | <i>APOC1, APOC4, APOE</i>   | 19 | 50,085,805  | 50,086,330  |
| 239 | MK | <i>APOC1, APOC4, APOE</i>   | 19 | 50,150,331  | 50,150,527  |
| 240 | MK | <i>APOC1, APOC4, APOE</i>   | 19 | 50,196,319  | 50,196,568  |
| 241 | MK | <i>APOC1, APOC4, APOE</i>   | 19 | 50,197,042  | 50,197,263  |
| 242 | MK | <i>GP6</i>                  | 19 | 60,209,244  | 60,209,397  |
| 243 | MK | <i>GP6</i>                  | 19 | 60,241,556  | 60,241,679  |
| 244 | MK | <i>GP6</i>                  | 19 | 60,245,094  | 60,245,382  |
| 245 | MK | <i>SIRPA</i>                | 20 | 1,894,347   | 1,894,752   |
| 246 | MK | <i>SLC5A3, MRPS6, KCNE2</i> | 21 | 34,356,285  | 34,356,436  |
| 247 | MK | <i>SLC5A3, MRPS6, KCNE2</i> | 21 | 34,367,396  | 34,367,825  |
| 248 | MK | <i>SLC5A3, MRPS6, KCNE2</i> | 21 | 34,368,044  | 34,368,422  |
| 249 | MK | <i>GNAZ</i>                 | 22 | 21,742,217  | 21,742,604  |
| 250 | MK | <i>GNAZ</i>                 | 22 | 21,759,106  | 21,759,267  |
| 251 | MK | <i>GNAZ</i>                 | 22 | 21,814,206  | 21,814,411  |
| 252 | MK | <i>FBXO7</i>                | 22 | 31,199,429  | 31,199,582  |
| 253 | MK | <i>FBXO7</i>                | 22 | 31,200,572  | 31,201,245  |
| 254 | MK | <i>TMPRSS6</i>              | 22 | 35,734,504  | 35,734,624  |
| 1   | EB | <i>PCSK9</i>                | 1  | 55,274,268  | 55,274,391  |
| 2   | EB | <i>PCSK9</i>                | 1  | 55,277,637  | 55,277,808  |
| 3   | EB | <i>VAV3</i>                 | 1  | 107,914,840 | 107,915,135 |
| 4   | EB | <i>CELSR2, PSRC1, SORT1</i> | 1  | 109,525,340 | 109,525,629 |
| 5   | EB | <i>CELSR2, PSRC1, SORT1</i> | 1  | 109,537,919 | 109,538,062 |
| 6   | EB | <i>CELSR2, PSRC1, SORT1</i> | 1  | 109,542,236 | 109,542,359 |
| 7   | EB | <i>CELSR2, PSRC1, SORT1</i> | 1  | 109,545,395 | 109,545,538 |
| 8   | EB | <i>CELSR2, PSRC1, SORT1</i> | 1  | 109,557,953 | 109,558,138 |
| 9   | EB | <i>CELSR2, PSRC1, SORT1</i> | 1  | 109,559,051 | 109,559,228 |
| 10  | EB | <i>CELSR2, PSRC1, SORT1</i> | 1  | 109,593,547 | 109,593,856 |
| 11  | EB | <i>CELSR2, PSRC1, SORT1</i> | 1  | 109,598,235 | 109,598,954 |

|    |    |                             |   |             |             |
|----|----|-----------------------------|---|-------------|-------------|
| 12 | EB | <i>CELSR2, PSRC1, SORT1</i> | 1 | 109,607,821 | 109,608,078 |
| 13 | EB | <i>CELSR2, PSRC1, SORT1</i> | 1 | 109,621,701 | 109,621,870 |
| 14 | EB | <i>CELSR2, PSRC1, SORT1</i> | 1 | 109,627,312 | 109,627,595 |
| 15 | EB | <i>CELSR2, PSRC1, SORT1</i> | 1 | 109,651,363 | 109,651,970 |
| 16 | EB | <i>CELSR2, PSRC1, SORT1</i> | 1 | 109,734,038 | 109,734,237 |
| 17 | EB | <i>CELSR2, PSRC1, SORT1</i> | 1 | 109,737,130 | 109,737,247 |
| 18 | EB | <i>CELSR2, PSRC1, SORT1</i> | 1 | 109,738,078 | 109,738,788 |
| 19 | EB | <i>PEAR1</i>                | 1 | 155,126,625 | 155,126,793 |
| 20 | EB | <i>PEAR1</i>                | 1 | 155,128,772 | 155,128,965 |
| 21 | EB | <i>PEAR1</i>                | 1 | 155,131,308 | 155,131,731 |
| 22 | EB | <i>PEAR1</i>                | 1 | 155,151,018 | 155,151,163 |
| 23 | EB | <i>PEAR1</i>                | 1 | 155,156,848 | 155,157,069 |
| 24 | EB | <i>PEAR1</i>                | 1 | 155,194,832 | 155,194,983 |
| 25 | EB | <i>FCER1G</i>               | 1 | 159,462,115 | 159,462,448 |
| 26 | EB | <i>FCER1G</i>               | 1 | 159,463,860 | 159,464,007 |
| 27 | EB | <i>DNM3</i>                 | 1 | 170,238,636 | 170,238,785 |
| 28 | EB | <i>TMCC2</i>                | 1 | 203,447,052 | 203,447,525 |
| 29 | EB | <i>TMCC2</i>                | 1 | 203,463,544 | 203,463,687 |
| 30 | EB | <i>TMCC2</i>                | 1 | 203,491,827 | 203,492,110 |
| 31 | EB | <i>TMCC2</i>                | 1 | 203,509,317 | 203,509,504 |
| 32 | EB | <i>TMCC2</i>                | 1 | 203,520,592 | 203,520,795 |
| 33 | EB | <i>MIA3</i>                 | 1 | 220,695,202 | 220,695,367 |
| 34 | EB | <i>MIA3</i>                 | 1 | 220,704,890 | 220,705,065 |
| 35 | EB | <i>MIA3</i>                 | 1 | 220,705,358 | 220,705,709 |
| 36 | EB | <i>MIA3</i>                 | 1 | 220,829,812 | 220,829,985 |
| 37 | EB | <i>MIA3</i>                 | 1 | 220,857,762 | 220,858,116 |
| 38 | EB | <i>MIA3</i>                 | 1 | 220,874,539 | 220,874,712 |
| 39 | EB | <i>MIA3</i>                 | 1 | 220,884,085 | 220,884,324 |
| 40 | EB | <i>MIA3</i>                 | 1 | 220,949,894 | 220,950,017 |
| 41 | EB | <i>MIA3</i>                 | 1 | 220,952,051 | 220,952,194 |
| 42 | EB | <i>MIA3</i>                 | 1 | 220,952,425 | 220,953,397 |
| 43 | EB | <i>EHD3</i>                 | 2 | 31,310,205  | 31,310,690  |
| 44 | EB | <i>STK39</i>                | 2 | 168,701,254 | 168,701,388 |
| 45 | EB | <i>WDR12</i>                | 2 | 203,443,847 | 203,444,734 |
| 46 | EB | <i>WDR12</i>                | 2 | 203,484,326 | 203,485,130 |
| 47 | EB | <i>WDR12</i>                | 2 | 203,485,151 | 203,485,300 |
| 48 | EB | <i>ITPR1</i>                | 3 | 4,831,121   | 4,831,353   |
| 49 | EB | <i>ITPR1</i>                | 3 | 4,842,520   | 4,842,829   |
| 50 | EB | <i>ITPR1</i>                | 3 | 4,847,957   | 4,848,126   |
| 51 | EB | <i>RAF1</i>                 | 3 | 12,677,475  | 12,677,696  |
| 52 | EB | <i>RAF1</i>                 | 3 | 12,680,631  | 12,680,868  |
| 53 | EB | <i>ULK4</i>                 | 3 | 41,716,767  | 41,716,992  |
| 54 | EB | <i>ULK4</i>                 | 3 | 41,722,521  | 41,722,672  |
| 55 | EB | <i>ARHGEF3</i>              | 3 | 56,808,646  | 56,808,811  |
| 56 | EB | <i>ARHGEF3</i>              | 3 | 56,810,752  | 56,811,195  |

|     |    |                    |   |             |             |
|-----|----|--------------------|---|-------------|-------------|
| 57  | EB | <i>MRAS</i>        | 3 | 139,550,152 | 139,550,443 |
| 58  | EB | <i>P2RY12</i>      | 3 | 152,428,319 | 152,428,498 |
| 59  | EB | <i>P2RY12</i>      | 3 | 152,483,531 | 152,483,709 |
| 60  | EB | <i>P2RY12</i>      | 3 | 152,528,231 | 152,528,398 |
| 61  | EB | <i>ITGA2</i>       | 5 | 52,280,175  | 52,280,348  |
| 62  | EB | <i>ITGA2</i>       | 5 | 52,320,815  | 52,321,224  |
| 63  | EB | <i>ITGA2</i>       | 5 | 52,350,926  | 52,351,127  |
| 64  | EB | <i>ITGA2</i>       | 5 | 52,427,696  | 52,427,819  |
| 65  | EB | <i>PHACTR1</i>     | 6 | 13,002,249  | 13,002,377  |
| 66  | EB | <i>HFE</i>         | 6 | 26,195,745  | 26,196,200  |
| 67  | EB | <i>HFE</i>         | 6 | 26,205,599  | 26,205,740  |
| 68  | EB | <i>HFE</i>         | 6 | 26,211,917  | 26,212,141  |
| 69  | EB | <i>HFE</i>         | 6 | 26,227,238  | 26,227,731  |
| 70  | EB | <i>HFE</i>         | 6 | 26,231,260  | 26,231,427  |
| 71  | EB | <i>HFE</i>         | 6 | 26,232,120  | 26,232,436  |
| 72  | EB | <i>HFE</i>         | 6 | 26,234,394  | 26,234,537  |
| 73  | EB | <i>BAK1</i>        | 6 | 33,647,058  | 33,647,257  |
| 74  | EB | <i>BAK1</i>        | 6 | 33,655,957  | 33,656,076  |
| 75  | EB | <i>MAPK14</i>      | 6 | 36,101,431  | 36,101,637  |
| 76  | EB | <i>MAPK14</i>      | 6 | 36,103,262  | 36,103,575  |
| 77  | EB | <i>MAPK14</i>      | 6 | 36,105,345  | 36,105,533  |
| 78  | EB | <i>MAPK14</i>      | 6 | 36,143,537  | 36,143,732  |
| 79  | EB | <i>MAPK14</i>      | 6 | 36,171,002  | 36,171,191  |
| 80  | EB | <i>MAPK14</i>      | 6 | 36,174,679  | 36,175,296  |
| 81  | EB | <i>MAPK14</i>      | 6 | 36,192,670  | 36,192,965  |
| 82  | EB | <i>MAPK14</i>      | 6 | 36,194,368  | 36,194,593  |
| 83  | EB | <i>MAPK14</i>      | 6 | 36,203,342  | 36,203,513  |
| 84  | EB | <i>BSYL, CCND3</i> | 6 | 41,996,759  | 41,997,176  |
| 85  | EB | <i>BSYL, CCND3</i> | 6 | 42,012,097  | 42,012,241  |
| 86  | EB | <i>BSYL, CCND3</i> | 6 | 42,014,025  | 42,014,170  |
| 87  | EB | <i>BSYL, CCND3</i> | 6 | 42,015,249  | 42,015,400  |
| 88  | EB | <i>BSYL, CCND3</i> | 6 | 42,017,009  | 42,017,658  |
| 89  | EB | <i>BSYL, CCND3</i> | 6 | 42,042,869  | 42,043,025  |
| 90  | EB | <i>BSYL, CCND3</i> | 6 | 42,043,397  | 42,043,601  |
| 91  | EB | <i>BSYL, CCND3</i> | 6 | 42,093,014  | 42,093,185  |
| 92  | EB | <i>BSYL, CCND3</i> | 6 | 42,104,341  | 42,104,544  |
| 93  | EB | <i>HBS1L, MYB</i>  | 6 | 135,417,607 | 135,417,890 |
| 94  | EB | <i>HBS1L, MYB</i>  | 6 | 135,436,982 | 135,437,159 |
| 95  | EB | <i>HBS1L, MYB</i>  | 6 | 135,447,456 | 135,447,646 |
| 96  | EB | <i>HBS1L, MYB</i>  | 6 | 135,457,519 | 135,457,641 |
| 97  | EB | <i>HBS1L, MYB</i>  | 6 | 135,459,977 | 135,460,413 |
| 98  | EB | <i>HBS1L, MYB</i>  | 6 | 135,473,102 | 135,473,368 |
| 99  | EB | <i>HBS1L, MYB</i>  | 6 | 135,507,891 | 135,508,040 |
| 100 | EB | <i>HBS1L, MYB</i>  | 6 | 135,510,588 | 135,510,958 |
| 101 | EB | <i>HBS1L, MYB</i>  | 6 | 135,525,588 | 135,525,737 |



|     |    |                            |    |             |             |
|-----|----|----------------------------|----|-------------|-------------|
| 102 | EB | <i>HBS1L, MYB</i>          | 6  | 135,543,329 | 135,543,480 |
| 103 | EB | <i>HBS1L, MYB</i>          | 6  | 135,544,020 | 135,544,170 |
| 104 | EB | <i>HBS1L, MYB</i>          | 6  | 135,546,826 | 135,546,982 |
| 105 | EB | <i>HBS1L, MYB</i>          | 6  | 135,554,400 | 135,555,332 |
| 106 | EB | <i>MTHFD1L</i>             | 6  | 151,207,350 | 151,207,504 |
| 107 | EB | <i>MTHFD1L</i>             | 6  | 151,228,401 | 151,228,738 |
| 108 | EB | <i>MTHFD1L</i>             | 6  | 151,254,856 | 151,254,996 |
| 109 | EB | <i>SLC22A3, LPAL2, LPA</i> | 6  | 160,797,077 | 160,797,318 |
| 110 | EB | <i>SLC22A3, LPAL2, LPA</i> | 6  | 160,861,000 | 160,861,409 |
| 111 | EB | <i>SLC22A3, LPAL2, LPA</i> | 6  | 160,919,779 | 160,919,916 |
| 112 | EB | <i>TFR2</i>                | 7  | 100,062,195 | 100,062,441 |
| 113 | EB | <i>TFR2</i>                | 7  | 100,065,016 | 100,065,141 |
| 114 | EB | <i>TFR2</i>                | 7  | 100,077,067 | 100,077,206 |
| 115 | EB | <i>TFR2</i>                | 7  | 100,091,895 | 100,092,114 |
| 116 | EB | <i>FLJ36031, PIK3CG</i>    | 7  | 106,085,915 | 106,086,298 |
| 117 | EB | <i>FLJ36031, PIK3CG</i>    | 7  | 106,086,951 | 106,087,369 |
| 118 | EB | <i>FLJ36031, PIK3CG</i>    | 7  | 106,087,579 | 106,088,608 |
| 119 | EB | <i>FLJ36031, PIK3CG</i>    | 7  | 106,088,749 | 106,088,894 |
| 120 | EB | <i>FLJ36031, PIK3CG</i>    | 7  | 106,106,954 | 106,107,461 |
| 121 | EB | <i>FLJ36031, PIK3CG</i>    | 7  | 106,145,978 | 106,146,139 |
| 122 | EB | <i>FLJ36031, PIK3CG</i>    | 7  | 106,164,291 | 106,164,480 |
| 123 | EB | <i>FLJ36031, PIK3CG</i>    | 7  | 106,165,063 | 106,165,231 |
| 124 | EB | <i>AK3, RCL1, JAK2</i>     | 9  | 4,731,191   | 4,731,464   |
| 125 | EB | <i>AK3, RCL1, JAK2</i>     | 9  | 4,740,131   | 4,740,281   |
| 126 | EB | <i>AK3, RCL1, JAK2</i>     | 9  | 4,752,645   | 4,752,818   |
| 127 | EB | <i>AK3, RCL1, JAK2</i>     | 9  | 4,759,460   | 4,759,622   |
| 128 | EB | <i>AK3, RCL1, JAK2</i>     | 9  | 4,782,722   | 4,783,059   |
| 129 | EB | <i>AK3, RCL1, JAK2</i>     | 9  | 4,788,403   | 4,788,594   |
| 130 | EB | <i>AK3, RCL1, JAK2</i>     | 9  | 4,789,900   | 4,790,089   |
| 131 | EB | <i>AK3, RCL1, JAK2</i>     | 9  | 4,818,810   | 4,819,123   |
| 132 | EB | <i>AK3, RCL1, JAK2</i>     | 9  | 4,823,320   | 4,823,517   |
| 133 | EB | <i>AK3, RCL1, JAK2</i>     | 9  | 4,842,517   | 4,842,710   |
| 134 | EB | <i>AK3, RCL1, JAK2</i>     | 9  | 4,845,071   | 4,845,268   |
| 135 | EB | <i>AK3, RCL1, JAK2</i>     | 9  | 4,852,849   | 4,853,186   |
| 136 | EB | <i>AK3, RCL1, JAK2</i>     | 9  | 4,855,814   | 4,855,959   |
| 137 | EB | <i>AK3, RCL1, JAK2</i>     | 9  | 4,914,359   | 4,914,516   |
| 138 | EB | <i>AK3, RCL1, JAK2</i>     | 9  | 4,917,093   | 4,917,637   |
| 139 | EB | <i>AK3, RCL1, JAK2</i>     | 9  | 4,975,147   | 4,975,388   |
| 140 | EB | <i>AK3, RCL1, JAK2</i>     | 9  | 4,978,008   | 4,978,131   |
| 141 | EB | <i>CXCL12</i>              | 10 | 44,126,559  | 44,126,820  |
| 142 | EB | <i>CXCL12</i>              | 10 | 44,131,944  | 44,132,213  |
| 143 | EB | <i>JMJD1C</i>              | 10 | 64,588,027  | 64,588,162  |
| 144 | EB | <i>JMJD1C</i>              | 10 | 64,596,732  | 64,596,856  |
| 145 | EB | <i>JMJD1C</i>              | 10 | 64,646,971  | 64,647,116  |
| 146 | EB | <i>JMJD1C</i>              | 10 | 64,666,261  | 64,666,430  |

|     |    |                             |    |             |             |
|-----|----|-----------------------------|----|-------------|-------------|
| 147 | EB | <i>JMJD1C</i>               | 10 | 64,694,262  | 64,694,665  |
| 148 | EB | <i>JMJD1C</i>               | 10 | 64,694,963  | 64,695,179  |
| 149 | EB | <i>JMJD1C</i>               | 10 | 64,695,295  | 64,696,104  |
| 150 | EB | <i>JMJD1C</i>               | 10 | 64,696,220  | 64,697,726  |
| 151 | EB | <i>JMJD1C</i>               | 10 | 64,697,743  | 64,698,439  |
| 152 | EB | <i>JMJD1C</i>               | 10 | 64,698,979  | 64,699,206  |
| 153 | EB | <i>JMJD1C</i>               | 10 | 64,753,836  | 64,754,060  |
| 154 | EB | <i>JMJD1C</i>               | 10 | 64,894,834  | 64,895,217  |
| 155 | EB | <i>JMJD1C</i>               | 10 | 64,895,652  | 64,895,891  |
| 156 | EB | <i>CYP17A1</i>              | 10 | 104,564,250 | 104,564,529 |
| 157 | EB | <i>CYP17A1</i>              | 10 | 104,604,251 | 104,604,420 |
| 158 | EB | <i>CYP17A1</i>              | 10 | 104,651,251 | 104,651,444 |
| 159 | EB | <i>CYP17A1</i>              | 10 | 104,667,738 | 104,668,027 |
| 160 | EB | <i>BET1L, SIRT3, PSMD13</i> | 11 | 197,021     | 197,756     |
| 161 | EB | <i>BET1L, SIRT3, PSMD13</i> | 11 | 210,615     | 210,739     |
| 162 | EB | <i>BET1L, SIRT3, PSMD13</i> | 11 | 226,313     | 226,941     |
| 163 | EB | <i>PLEKHA7</i>              | 11 | 16,798,523  | 16,798,666  |
| 164 | EB | <i>PLEKHA7</i>              | 11 | 16,835,449  | 16,835,666  |
| 165 | EB | <i>ATP2B1</i>               | 12 | 88,460,946  | 88,461,129  |
| 166 | EB | <i>ATP2B1</i>               | 12 | 88,492,709  | 88,493,151  |
| 167 | EB | <i>ATP2B1</i>               | 12 | 88,581,495  | 88,581,644  |
| 168 | EB | <i>ATP2B1</i>               | 12 | 88,582,070  | 88,582,255  |
| 169 | EB | <i>ATP2B1</i>               | 12 | 88,596,236  | 88,596,392  |
| 170 | EB | <i>ATP2B1</i>               | 12 | 88,626,553  | 88,627,268  |
| 171 | EB | <i>ATP2B1</i>               | 12 | 88,627,333  | 88,627,650  |
| 172 | EB | <i>SH2B3/LNK, ATXN2</i>     | 12 | 110,325,149 | 110,325,300 |
| 173 | EB | <i>SH2B3/LNK, ATXN2</i>     | 12 | 110,327,583 | 110,328,060 |
| 174 | EB | <i>SH2B3/LNK, ATXN2</i>     | 12 | 110,332,012 | 110,332,542 |
| 175 | EB | <i>SH2B3/LNK, ATXN2</i>     | 12 | 110,373,983 | 110,374,130 |
| 176 | EB | <i>SH2B3/LNK, ATXN2</i>     | 12 | 110,500,460 | 110,500,606 |
| 177 | EB | <i>SH2B3/LNK, ATXN2</i>     | 12 | 110,519,271 | 110,519,415 |
| 178 | EB | <i>SH2B3/LNK, ATXN2</i>     | 12 | 110,520,341 | 110,521,038 |
| 179 | EB | <i>SH2B3/LNK, ATXN2</i>     | 12 | 110,521,760 | 110,521,891 |
| 180 | EB | <i>SH2B3/LNK, ATXN2</i>     | 12 | 110,557,836 | 110,557,985 |
| 181 | EB | <i>SH2B3/LNK, ATXN2</i>     | 12 | 110,558,848 | 110,559,043 |
| 182 | EB | <i>PTPN11</i>               | 12 | 111,331,727 | 111,331,862 |
| 183 | EB | <i>PTPN11</i>               | 12 | 111,333,831 | 111,333,979 |
| 184 | EB | <i>PTPN11</i>               | 12 | 111,340,934 | 111,341,279 |
| 185 | EB | <i>HNF1A/TCF1, C12orf43</i> | 12 | 119,894,015 | 119,894,229 |
| 186 | EB | <i>HNF1A/TCF1, C12orf43</i> | 12 | 119,938,622 | 119,938,801 |
| 187 | EB | <i>WDR66</i>                | 12 | 120,761,821 | 120,762,094 |
| 188 | EB | <i>WDR66</i>                | 12 | 120,810,814 | 120,811,511 |
| 189 | EB | <i>WDR66</i>                | 12 | 120,815,510 | 120,815,633 |
| 190 | EB | <i>WDR66</i>                | 12 | 120,856,177 | 120,856,394 |
| 191 | EB | <i>WDR66</i>                | 12 | 120,944,486 | 120,945,014 |

|     |    |                           |    |            |            |
|-----|----|---------------------------|----|------------|------------|
| 192 | EB | <i>TPM1</i>               | 15 | 61,127,313 | 61,127,676 |
| 193 | EB | <i>TPM1</i>               | 15 | 61,130,687 | 61,130,867 |
| 194 | EB | <i>TPM1</i>               | 15 | 61,142,505 | 61,142,866 |
| 195 | EB | <i>SMAD3</i>              | 15 | 65,155,728 | 65,155,873 |
| 196 | EB | <i>SMAD3</i>              | 15 | 65,170,689 | 65,170,888 |
| 197 | EB | <i>SMAD3</i>              | 15 | 65,205,049 | 65,205,218 |
| 198 | EB | <i>SMAD3</i>              | 15 | 65,287,103 | 65,287,445 |
| 199 | EB | <i>SMAD3</i>              | 15 | 65,334,079 | 65,334,248 |
| 200 | EB | <i>CSK, ULK3</i>          | 15 | 72,861,346 | 72,861,599 |
| 201 | EB | <i>CSK, ULK3</i>          | 15 | 72,922,029 | 72,922,288 |
| 202 | EB | <i>CSK, ULK3</i>          | 15 | 72,922,603 | 72,922,794 |
| 203 | EB | <i>CSK, ULK3</i>          | 15 | 72,952,395 | 72,952,532 |
| 204 | EB | <i>CSK, ULK3</i>          | 15 | 72,969,359 | 72,969,478 |
| 205 | EB | <i>CSK, ULK3</i>          | 15 | 72,986,226 | 72,986,345 |
| 206 | EB | <i>CSK, ULK3</i>          | 15 | 73,017,434 | 73,017,675 |
| 207 | EB | <i>CSK, ULK3</i>          | 15 | 73,029,865 | 73,030,026 |
| 208 | EB | <i>MAP2K4</i>             | 17 | 11,864,740 | 11,864,995 |
| 209 | EB | <i>TAOK1</i>              | 17 | 24,721,397 | 24,721,534 |
| 210 | EB | <i>TAOK1</i>              | 17 | 24,741,312 | 24,741,554 |
| 211 | EB | <i>TAOK1</i>              | 17 | 24,888,250 | 24,888,373 |
| 212 | EB | <i>TAOK1</i>              | 17 | 24,908,398 | 24,908,777 |
| 213 | EB | <i>TAOK1</i>              | 17 | 24,919,092 | 24,919,239 |
| 214 | EB | <i>TAOK1</i>              | 17 | 24,919,646 | 24,919,832 |
| 215 | EB | <i>GSDMA, ORMDL3</i>      | 17 | 35,337,403 | 35,337,552 |
| 216 | EB | <i>GSDMA, ORMDL3</i>      | 17 | 35,339,061 | 35,339,338 |
| 217 | EB | <i>GSDMA, ORMDL3</i>      | 17 | 35,362,511 | 35,363,278 |
| 218 | EB | <i>GSDMA, ORMDL3</i>      | 17 | 35,368,822 | 35,368,959 |
| 219 | EB | <i>CD226</i>              | 18 | 65,657,222 | 65,657,632 |
| 220 | EB | <i>MAP2K2</i>             | 19 | 4,075,128  | 4,075,297  |
| 221 | EB | <i>MAP2K2</i>             | 19 | 4,082,054  | 4,082,195  |
| 222 | EB | <i>LDLR</i>               | 19 | 11,061,022 | 11,061,167 |
| 223 | EB | <i>LDLR</i>               | 19 | 11,062,115 | 11,062,260 |
| 224 | EB | <i>LDLR</i>               | 19 | 11,066,803 | 11,066,988 |
| 225 | EB | <i>AKT2</i>               | 19 | 45,406,952 | 45,407,150 |
| 226 | EB | <i>AKT2</i>               | 19 | 45,483,138 | 45,483,327 |
| 227 | EB | <i>AKT2</i>               | 19 | 45,503,197 | 45,503,389 |
| 228 | EB | <i>APOC1, APOC4, APOE</i> | 19 | 50,041,082 | 50,041,319 |
| 229 | EB | <i>APOC1, APOC4, APOE</i> | 19 | 50,085,593 | 50,086,330 |
| 230 | EB | <i>APOC1, APOC4, APOE</i> | 19 | 50,122,302 | 50,122,487 |
| 231 | EB | <i>APOC1, APOC4, APOE</i> | 19 | 50,150,303 | 50,150,503 |
| 232 | EB | <i>APOC1, APOC4, APOE</i> | 19 | 50,196,398 | 50,196,568 |
| 233 | EB | <i>APOC1, APOC4, APOE</i> | 19 | 50,197,042 | 50,197,351 |
| 234 | EB | <i>GP6</i>                | 19 | 60,209,244 | 60,209,397 |
| 235 | EB | <i>GP6</i>                | 19 | 60,230,073 | 60,230,138 |
| 236 | EB | <i>GP6</i>                | 19 | 60,230,479 | 60,230,694 |

|     |    |                             |    |            |            |
|-----|----|-----------------------------|----|------------|------------|
| 237 | EB | <i>GP6</i>                  | 19 | 60,241,578 | 60,241,731 |
| 238 | EB | <i>GP6</i>                  | 19 | 60,245,122 | 60,245,382 |
| 239 | EB | <i>SIRPA</i>                | 20 | 1,823,147  | 1,824,032  |
| 240 | EB | <i>SIRPA</i>                | 20 | 1,894,417  | 1,894,616  |
| 241 | EB | <i>SLC5A3, MRPS6, KCNE2</i> | 21 | 34,356,285 | 34,356,436 |
| 242 | EB | <i>SLC5A3, MRPS6, KCNE2</i> | 21 | 34,367,396 | 34,367,825 |
| 243 | EB | <i>SLC5A3, MRPS6, KCNE2</i> | 21 | 34,368,044 | 34,368,452 |
| 244 | EB | <i>SLC5A3, MRPS6, KCNE2</i> | 21 | 34,404,980 | 34,405,117 |
| 245 | EB | <i>SLC5A3, MRPS6, KCNE2</i> | 21 | 34,484,864 | 34,485,014 |
| 246 | EB | <i>GNAZ</i>                 | 22 | 21,742,291 | 21,742,604 |
| 247 | EB | <i>GNAZ</i>                 | 22 | 21,814,182 | 21,814,349 |
| 248 | EB | <i>GNAZ</i>                 | 22 | 21,817,463 | 21,817,638 |
| 249 | EB | <i>FBXO7</i>                | 22 | 31,195,930 | 31,196,041 |
| 250 | EB | <i>FBXO7</i>                | 22 | 31,200,572 | 31,200,839 |
| 251 | EB | <i>FBXO7</i>                | 22 | 31,208,867 | 31,209,065 |

**(B) Lineage-specific reference genes**

| #  | Cell type | Gene         | Lineage        | Genomic position |             |             |
|----|-----------|--------------|----------------|------------------|-------------|-------------|
|    |           |              |                | Chromosome       | Start       | End         |
| 1  | MK        | <i>SELP</i>  | megakaryocytic | 1                | 167,837,047 | 167,837,214 |
| 2  | MK        | <i>SELP</i>  | megakaryocytic | 1                | 167,840,713 | 167,840,910 |
| 3  | MK        | <i>SELP</i>  | megakaryocytic | 1                | 167,860,923 | 167,861,131 |
| 4  | MK        | <i>SELP</i>  | megakaryocytic | 1                | 167,864,661 | 167,864,809 |
| 5  | MK        | <i>SELP</i>  | megakaryocytic | 1                | 167,865,949 | 167,866,124 |
| 6  | MK        | <i>DDEF2</i> | megakaryocytic | 2                | 9,263,856   | 9,264,613   |
| 7  | MK        | <i>DDEF2</i> | megakaryocytic | 2                | 9,280,894   | 9,281,103   |
| 8  | MK        | <i>DDEF2</i> | megakaryocytic | 2                | 9,288,553   | 9,288,734   |
| 9  | MK        | <i>DDEF2</i> | megakaryocytic | 2                | 9,292,403   | 9,292,583   |
| 10 | MK        | <i>DDEF2</i> | megakaryocytic | 2                | 9,321,027   | 9,321,370   |
| 11 | MK        | <i>DDEF2</i> | megakaryocytic | 2                | 9,324,449   | 9,324,618   |
| 12 | MK        | <i>DDEF2</i> | megakaryocytic | 2                | 9,352,468   | 9,352,664   |
| 13 | MK        | <i>DDEF2</i> | megakaryocytic | 2                | 9,388,234   | 9,388,453   |
| 14 | MK        | <i>DDEF2</i> | megakaryocytic | 2                | 9,389,371   | 9,389,510   |
| 15 | MK        | <i>DDEF2</i> | megakaryocytic | 2                | 9,391,309   | 9,391,498   |
| 16 | MK        | <i>MEIS1</i> | megakaryocytic | 2                | 66,514,062  | 66,514,325  |
| 17 | MK        | <i>MEIS1</i> | megakaryocytic | 2                | 66,514,948  | 66,515,087  |
| 18 | MK        | <i>MEIS1</i> | megakaryocytic | 2                | 66,515,690  | 66,515,914  |
| 19 | MK        | <i>MEIS1</i> | megakaryocytic | 2                | 66,559,525  | 66,559,685  |
| 20 | MK        | <i>MEIS1</i> | megakaryocytic | 2                | 66,561,771  | 66,562,180  |
| 21 | MK        | <i>MEIS1</i> | megakaryocytic | 2                | 66,570,205  | 66,570,361  |
| 22 | MK        | <i>MEIS1</i> | megakaryocytic | 2                | 66,571,513  | 66,571,665  |
| 23 | MK        | <i>MEIS1</i> | megakaryocytic | 2                | 66,607,872  | 66,607,998  |
| 24 | MK        | <i>MEIS1</i> | megakaryocytic | 2                | 66,608,356  | 66,608,553  |
| 25 | MK        | <i>PID1</i>  | monocytic      | 2                | 229,753,747 | 229,754,002 |

|    |    |                 |                 |    |             |             |
|----|----|-----------------|-----------------|----|-------------|-------------|
| 26 | MK | <i>MYLK</i>     | megakaryocytic  | 3  | 124,844,018 | 124,844,185 |
| 27 | MK | <i>MYLK</i>     | megakaryocytic  | 3  | 124,869,318 | 124,869,576 |
| 28 | MK | <i>MYLK</i>     | megakaryocytic  | 3  | 124,895,526 | 124,895,719 |
| 29 | MK | <i>MYLK</i>     | megakaryocytic  | 3  | 124,897,280 | 124,897,593 |
| 30 | MK | <i>MYLK</i>     | megakaryocytic  | 3  | 124,925,235 | 124,925,374 |
| 31 | MK | <i>MYLK</i>     | megakaryocytic  | 3  | 125,015,596 | 125,015,865 |
| 32 | MK | <i>MYLK</i>     | megakaryocytic  | 3  | 125,043,039 | 125,043,245 |
| 33 | MK | <i>MYLK</i>     | megakaryocytic  | 3  | 125,085,915 | 125,086,098 |
| 34 | MK | <i>FAM83A</i>   | erythroblastoid | 8  | 124,263,976 | 124,264,163 |
| 35 | MK | <i>FAM83A</i>   | erythroblastoid | 8  | 124,284,318 | 124,284,538 |
| 36 | MK | <i>NFIB</i>     | megakaryocytic  | 9  | 14,145,441  | 14,145,629  |
| 37 | MK | <i>NFIB</i>     | megakaryocytic  | 9  | 14,189,398  | 14,189,555  |
| 38 | MK | <i>NFIB</i>     | megakaryocytic  | 9  | 14,200,125  | 14,200,850  |
| 39 | MK | <i>NFIB</i>     | megakaryocytic  | 9  | 14,202,185  | 14,203,126  |
| 40 | MK | <i>NFIB</i>     | megakaryocytic  | 9  | 14,204,486  | 14,204,659  |
| 41 | MK | <i>NFIB</i>     | megakaryocytic  | 9  | 14,299,554  | 14,299,728  |
| 42 | MK | <i>KLF4</i>     | monocytic       | 9  | 109,286,348 | 109,286,517 |
| 43 | MK | <i>FER1L3</i>   | monocytic       | 10 | 95,102,486  | 95,102,667  |
| 44 | MK | <i>FER1L3</i>   | monocytic       | 10 | 95,107,552  | 95,107,709  |
| 45 | MK | <i>FER1L3</i>   | monocytic       | 10 | 95,126,230  | 95,126,399  |
| 46 | MK | <i>FER1L3</i>   | monocytic       | 10 | 95,162,999  | 95,163,416  |
| 47 | MK | <i>FER1L3</i>   | monocytic       | 10 | 95,185,908  | 95,186,083  |
| 48 | MK | <i>FER1L3</i>   | monocytic       | 10 | 95,192,142  | 95,192,393  |
| 49 | MK | <i>FER1L3</i>   | monocytic       | 10 | 95,198,267  | 95,198,447  |
| 50 | MK | <i>FER1L3</i>   | monocytic       | 10 | 95,232,410  | 95,232,551  |
| 51 | MK | <i>ADCY6</i>    | megakaryocytic  | 12 | 47,445,610  | 47,446,237  |
| 52 | MK | <i>ADCY6</i>    | megakaryocytic  | 12 | 47,460,026  | 47,460,291  |
| 53 | MK | <i>CMTM5</i>    | megakaryocytic  | 14 | 22,916,720  | 22,916,905  |
| 54 | MK | <i>CALB2</i>    | erythroblastoid | 16 | 69,949,952  | 69,950,141  |
| 55 | MK | <i>CALB2</i>    | erythroblastoid | 16 | 69,958,830  | 69,959,111  |
| 56 | MK | <i>GDF15</i>    | erythroblastoid | 19 | 18,360,289  | 18,360,482  |
| 57 | MK | <i>RIN2</i>     | monocytic       | 20 | 19,863,502  | 19,863,781  |
| 58 | MK | <i>RIN2</i>     | monocytic       | 20 | 19,871,823  | 19,871,962  |
| 59 | MK | <i>RIN2</i>     | monocytic       | 20 | 19,924,018  | 19,924,243  |
| 1  | EB | <i>DDEF2</i>    | megakaryocytic  | 2  | 9,263,856   | 9,264,367   |
| 2  | EB | <i>DDEF2</i>    | megakaryocytic  | 2  | 9,292,425   | 9,292,593   |
| 3  | EB | <i>DDEF2</i>    | megakaryocytic  | 2  | 9,389,371   | 9,389,510   |
| 4  | EB | <i>DDEF2</i>    | megakaryocytic  | 2  | 9,392,990   | 9,393,351   |
| 5  | EB | <i>DDEF2</i>    | megakaryocytic  | 2  | 9,394,746   | 9,394,892   |
| 6  | EB | <i>MEIS1</i>    | megakaryocytic  | 2  | 66,514,142  | 66,514,283  |
| 7  | EB | <i>MEIS1</i>    | megakaryocytic  | 2  | 66,515,690  | 66,515,914  |
| 8  | EB | <i>MEIS1</i>    | megakaryocytic  | 2  | 66,561,947  | 66,562,116  |
| 9  | EB | <i>MEIS1</i>    | megakaryocytic  | 2  | 66,571,277  | 66,571,637  |
| 10 | EB | <i>MEIS1</i>    | megakaryocytic  | 2  | 66,576,847  | 66,577,049  |
| 11 | EB | <i>LOC51252</i> | erythroblastoid | 2  | 96,924,685  | 96,924,852  |

|    |    |               |                 |    |             |             |
|----|----|---------------|-----------------|----|-------------|-------------|
| 12 | EB | <i>PID1</i>   | monocytic       | 2  | 229,753,747 | 229,754,002 |
| 13 | EB | <i>MYLK</i>   | megakaryocytic  | 3  | 124,838,096 | 124,838,321 |
| 14 | EB | <i>MYLK</i>   | megakaryocytic  | 3  | 124,844,018 | 124,844,185 |
| 15 | EB | <i>MYLK</i>   | megakaryocytic  | 3  | 124,925,235 | 124,925,374 |
| 16 | EB | <i>MYLK</i>   | megakaryocytic  | 3  | 125,085,779 | 125,086,098 |
| 17 | EB | <i>CA1</i>    | erythroblastoid | 8  | 86,477,702  | 86,477,887  |
| 18 | EB | <i>FAM83A</i> | erythroblastoid | 8  | 124,264,050 | 124,264,163 |
| 19 | EB | <i>NFIB</i>   | megakaryocytic  | 9  | 14,098,110  | 14,098,253  |
| 20 | EB | <i>NFIB</i>   | megakaryocytic  | 9  | 14,303,979  | 14,304,498  |
| 21 | EB | <i>KLF4</i>   | monocytic       | 9  | 109,286,348 | 109,286,487 |
| 22 | EB | <i>KLF4</i>   | monocytic       | 9  | 109,291,850 | 109,292,093 |
| 23 | EB | <i>FER1L3</i> | monocytic       | 10 | 95,102,464  | 95,102,667  |
| 24 | EB | <i>FER1L3</i> | monocytic       | 10 | 95,232,428  | 95,232,551  |
| 25 | EB | <i>EPB42</i>  | erythroblastoid | 15 | 41,300,451  | 41,300,890  |
| 26 | EB | <i>HBZ</i>    | erythroblastoid | 16 | 142,536     | 142,677     |
| 27 | EB | <i>HBZ</i>    | erythroblastoid | 16 | 144,102     | 144,258     |
| 28 | EB | <i>ERAF</i>   | erythroblastoid | 16 | 31,446,616  | 31,446,727  |
| 29 | EB | <i>CALB2</i>  | erythroblastoid | 16 | 69,958,830  | 69,958,999  |
| 30 | EB | <i>GDF15</i>  | erythroblastoid | 19 | 18,357,853  | 18,358,148  |
| 31 | EB | <i>GDF15</i>  | erythroblastoid | 19 | 18,360,091  | 18,360,482  |
| 32 | EB | <i>RIN2</i>   | monocytic       | 20 | 19,876,616  | 19,876,811  |
| 33 | EB | <i>RIN2</i>   | monocytic       | 20 | 19,924,062  | 19,924,380  |
