# Supplementary material for: Maps of Open Chromatin Guide the Functional Follow-Up of Genome-Wide Association Signals: Application to Hematological Traits
Source: PubMed Central journal article supplement (PMC3128100; doi:10.1371/journal.pgen.1002139), 2011-06-30
Supplement: pgen.1002139.s009.pdf [file pgen.1002139.s009.pdf]

**Table S2. Comparison of the FAIRE peak density between the ENCODE (#1) and the here presented data sets (#2a,b).**

| #  | Human cell line                      | Formaldehyde cross-linking | Total sequence | Total number of peaks | Number of peaks per Mb |
|----|--------------------------------------|----------------------------|----------------|-----------------------|------------------------|
| 1  | Foreskin fibroblasts<br>[CCD-1070Sk] | 7 min                      | 29,998 kb      | 1,008                 | 33.6                   |
| 2a | MK cells<br>[CHRF-288-11]            | 8 min                      | 9,651 kb       | 397                   | 41.1                   |
|    |                                      | 12 min                     |                | 364                   | 37.7                   |
| 2b | EB cells<br>[K562]                   | 8 min                      | 9,651 kb       | 376                   | 39.0                   |
|    |                                      | 12 min                     |                | 333                   | 34.5                   |
