# Supplementary material for: Maps of Open Chromatin Guide the Functional Follow-Up of Genome-Wide Association Signals: Application to Hematological Traits
Source: PubMed Central journal article supplement (PMC3128100; doi:10.1371/journal.pgen.1002139), 2011-06-30
Supplement: pgen.1002139.s010.pdf [file pgen.1002139.s010.pdf]

**Table S3. Characterization of open chromatin regions in relation to gene annotations.**

| <b>Genomic location</b> | <b>MK cells only</b> | <b>EB cells only</b> | <b>Both cell types</b> |
|-------------------------|----------------------|----------------------|------------------------|
| Intergenic              | 20.2%                | 39.3%                | 26.5%                  |
| Intronic                | 72.5%                | 45.8%                | 41.4%                  |
| Overlap 3'-UTR          | 0.9%                 | 1.9%                 | 1.9%                   |
| Overlap 5'-UTR          | 4.6%                 | 5.6%                 | 28.4%                  |
| Exonic                  | 1.8%                 | 7.5%                 | 1.9%                   |
