# Supplementary material for: Maps of Open Chromatin Guide the Functional Follow-Up of Genome-Wide Association Signals: Application to Hematological Traits
Source: PubMed Central journal article supplement (PMC3128100; doi:10.1371/journal.pgen.1002139), 2011-06-30
Supplement: pgen.1002139.s011.pdf [file pgen.1002139.s011.pdf]

**Table S4. Investigation of the functional role of platelet volume-associated variants at chromosome 7q22.3.**

| Proxy to rs342293 |            |             |                |          |            |                | SNP overlaps with ... |                                                          |                                             |
|-------------------|------------|-------------|----------------|----------|------------|----------------|-----------------------|----------------------------------------------------------|---------------------------------------------|
| ID                | Chromosome | Position    | r <sup>2</sup> | Distance | Annotation | MPV<br>P-value | NDR in<br>MK cells    | Transcription factor (TF)<br>binding site (MatInspector) | Binding site of TF<br>expressed in MK cells |
| rs342207          | 7          | 106,108,641 | 0.81           | 50,814   | Intergenic | 1.46E-10       | -                     | -                                                        | -                                           |
| rs342209          | 7          | 106,109,208 | 0.84           | 50,247   | Intergenic | NA             | -                     | -                                                        | -                                           |
| rs342210          | 7          | 106,109,256 | 0.87           | 50,199   | Intergenic | 3.57E-11       | -                     | -                                                        | -                                           |
| rs342212          | 7          | 106,111,150 | 0.84           | 48,305   | Intergenic | 5.47E-11       | -                     | -                                                        | -                                           |
| rs342213          | 7          | 106,111,848 | 0.84           | 47,607   | Intergenic | 6.21E-11       | -                     | -                                                        | -                                           |
| rs342214          | 7          | 106,111,979 | 0.81           | 47,476   | Intergenic | NA             | -                     | -                                                        | -                                           |
| rs342236          | 7          | 106,122,874 | 0.84           | 36,581   | Intergenic | 1.24E-10       | -                     | -                                                        | -                                           |
| rs342239          | 7          | 106,124,138 | 0.90           | 35,317   | Intergenic | 6.97E-11       | -                     | -                                                        | -                                           |
| rs342240          | 7          | 106,124,486 | 0.90           | 34,969   | Intergenic | 6.97E-11       | -                     | HMX2                                                     | -                                           |
| rs342241          | 7          | 106,124,587 | 0.90           | 34,868   | Intergenic | NA             | -                     | -                                                        | -                                           |
| rs342242          | 7          | 106,126,225 | 0.90           | 33,230   | Intergenic | 6.43E-11       | -                     | -                                                        | -                                           |
| rs342244          | 7          | 106,128,061 | 0.81           | 31,394   | Intergenic | 1.43E-10       | -                     | -                                                        | -                                           |
| rs342247          | 7          | 106,130,427 | 0.84           | 29,028   | Intergenic | 4.23E-11       | -                     | HHEX, HOXC4, LBX2, MSX                                   | HHEX, MSX                                   |
| rs342248          | 7          | 106,130,541 | 0.84           | 28,914   | Intergenic | NA             | -                     | -                                                        | -                                           |
| rs342251          | 7          | 106,132,045 | 0.90           | 27,410   | Intergenic | NA             | -                     | -                                                        | -                                           |
| rs342252          | 7          | 106,133,666 | 0.90           | 25,789   | Intergenic | NA             | -                     | -                                                        | -                                           |
| rs342254          | 7          | 106,135,492 | 0.90           | 23,963   | Intergenic | 3.84E-11       | -                     | -                                                        | -                                           |
| rs342257          | 7          | 106,137,089 | 0.84           | 22,366   | Intergenic | 6.09E-11       | -                     | -                                                        | -                                           |

|            |   |             |      |        |            |          |   |                     |                     |
|------------|---|-------------|------|--------|------------|----------|---|---------------------|---------------------|
| rs342271   | 7 | 106,143,111 | 0.90 | 16,344 | Intergenic | NA       | - | -                   | -                   |
| rs342275   | 7 | 106,146,452 | 0.90 | 13,003 | Intergenic | 1.33E-11 | - | -                   | -                   |
| rs342281   | 7 | 106,149,079 | 0.84 | 10,376 | Intergenic | 5.36E-12 | - | -                   | -                   |
| rs342284   | 7 | 106,149,446 | 0.87 | 10,009 | Intergenic | 4.62E-12 | - | -                   | -                   |
| rs342286   | 7 | 106,151,835 | 0.94 | 7,620  | Intergenic | 4.90E-12 | - | -                   | -                   |
| rs342290   | 7 | 106,154,840 | 1.00 | 4,615  | Intergenic | NA       | - | -                   | -                   |
| rs342292   | 7 | 106,157,880 | 1.00 | 1,575  | Intergenic | 8.64E-13 | - | MEIS1, MEIS1A/HOXA9 | MEIS1, MEIS1A/HOXA9 |
| rs342293   | 7 | 106,159,455 | 1.00 | 0      | Intergenic | 6.75E-13 | + | GATA1, EVI1         | GATA1, EVI1         |
| rs342294   | 7 | 106,159,858 | 1.00 | 403    | Intergenic | NA       | + | -                   | -                   |
| rs342295   | 7 | 106,159,996 | 1.00 | 541    | Intergenic | 4.14E-13 | - | -                   | -                   |
| rs342296   | 7 | 106,160,139 | 1.00 | 684    | Intergenic | 7.68E-13 | - | -                   | -                   |
| rs342298   | 7 | 106,160,882 | 0.97 | 1,427  | Intergenic | 7.55E-13 | - | -                   | -                   |
| rs342299   | 7 | 106,160,954 | 0.97 | 1,499  | Intergenic | 7.55E-13 | - | -                   | -                   |
| rs386805   | 7 | 106,125,700 | 0.97 | 33,755 | Intergenic | NA       | - | -                   | -                   |
| rs67036916 | 7 | 106,154,872 | 0.97 | 4,583  | Intergenic | NA       | - | -                   | -                   |
| rs77655772 | 7 | 106,125,699 | 0.97 | 33,756 | Intergenic | NA       | - | -                   | -                   |

Proxy-SNPs to rs342293 ( $r^2 \geq 0.8$ ) were retrieved from the 1000 Genomes Project (Pilot 1, CEU). Genomic coordinates are based on the human reference genome, build hg18 (NCBI build 36). *P*-values for association with mean platelet volume (MPV) were obtained from Soranzo et al. *In silico* transcription binding site predictions were performed as described (Materials and Methods). Based on the HaemAtlas data, we defined genes as expressed when they exhibit a normalized expression value of at least 8.5.
