# Supplementary material for: Maps of Open Chromatin Guide the Functional Follow-Up of Genome-Wide Association Signals: Application to Hematological Traits
Source: PubMed Central journal article supplement (PMC3128100; doi:10.1371/journal.pgen.1002139), 2011-06-30
Supplement: pgen.1002139.s012.pdf [file pgen.1002139.s012.pdf]

**Table S5. Resequencing of the MK-specific open chromatin region at chromosome 7q22.3.**

|                   | <b>rs342293</b>                                                                   | <i>private</i>                                                                     | <b>rs342294</b>                                                                     |
|-------------------|-----------------------------------------------------------------------------------|------------------------------------------------------------------------------------|-------------------------------------------------------------------------------------|
| Calls             | 600/643 (93.3%)                                                                   | 633/643 (98.4%)                                                                    | 330/643 (51.3%)                                                                     |
| Position          | chr7:106,159,455                                                                  | chr7:106,159,601                                                                   | chr7:106,159,858                                                                    |
| Genotype          | C/G                                                                               | A/C                                                                                | T/C                                                                                 |
| MAF (observed)    | 0.4167                                                                            | 0.0008                                                                             | 0.3909                                                                              |
| MAF (HapMap)      | 0.482                                                                             | N/A                                                                                | 0.482                                                                               |
| MAF (1K Genomes)  | 0.458                                                                             | N/A                                                                                | 0.458                                                                               |
| Sequencing traces | 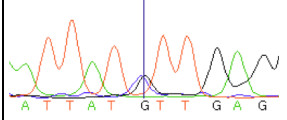 |  |  |

The low call rate for rs342294 was due to the location of the SNP, at the very end of the STS. Minor allele frequencies (MAF) from Phase II+III HapMap (CEU) and the 1000 Genomes Project (Pilot 1, CEU) were extracted from dbSNP v131. Genomic coordinates are based on the human reference genome, build hg18.
