# Supplementary material for: Maps of Open Chromatin Guide the Functional Follow-Up of Genome-Wide Association Signals: Application to Hematological Traits
Source: PubMed Central journal article supplement (PMC3128100; doi:10.1371/journal.pgen.1002139), 2011-06-30
Supplement: pgen.1002139.s013.pdf [file pgen.1002139.s013.pdf]

**Table S6. Expression QTL associations at the *PIK3CG* gene locus in platelets, macrophages, monocytes, B cells (LCLs), fat and skin.**

| Cell type / tissue | GWA index SNP | Proxy to rs342293 |                       |           | eQTL nominal <i>P</i> -value | SNP with the strongest association with <i>PIK3CG</i> expression in 1-Mb window |                                     |                              |
|--------------------|---------------|-------------------|-----------------------|-----------|------------------------------|---------------------------------------------------------------------------------|-------------------------------------|------------------------------|
|                    |               | ID                | <i>r</i> <sup>2</sup> | Distance  |                              | ID                                                                              | <i>r</i> <sup>2</sup> with rs342293 | eQTL nominal <i>P</i> -value |
| Platelets          | rs342293      |                   |                       |           | 0.0542                       | rs342293                                                                        | 1.000                               |                              |
| Macrophages        |               | rs342275          | 0.935                 | 13,003 bp | 0.0018                       | rs342275                                                                        | 0.935                               |                              |
| Monocytes          |               | rs342275          | 0.935                 | 13,003 bp | 0.4348                       | rs10953522                                                                      | 0.002                               | 0.0005                       |
| LCLs               |               | rs342296          | 1.000                 | 684 bp    | 0.5983                       | rs7788626                                                                       | 0.032                               | 0.0018                       |
|                    |               | rs342275          | 0.935                 | 13,003 bp | 0.9999                       |                                                                                 |                                     |                              |
| Fat                |               | rs342296          | 1.000                 | 684 bp    | 0.5308                       | rs849375                                                                        | 0.059                               | 0.0022                       |
|                    |               | rs342275          | 0.935                 | 13,003 bp | 0.6917                       |                                                                                 |                                     |                              |
| Skin               |               | rs342296          | 1.000                 | 684 bp    | 0.2091                       | rs13246564                                                                      | 0.045                               | 0.0006                       |
|                    |               | rs342275          | 0.935                 | 13,003 bp | 0.2537                       |                                                                                 |                                     |                              |

The strength of the relationship between alleles and gene expression intensities was estimated with the Spearman's rank correlation coefficient using the software Genevar (Materials and Methods). In macrophages and monocytes (as part of the data generated by the Cardiogenics Consortium), the rs342293 proxy-SNP rs342275 was used for the eQTL analysis. For LCLs, fat and skin (as part of the data generated by the MuTHER Consortium), the proxy-SNPs rs342296 and rs342275 were used for analysis. Values for *r*<sup>2</sup> were obtained from Phase II HapMap, CEU.
