# Supplementary material for: Maps of Open Chromatin Guide the Functional Follow-Up of Genome-Wide Association Signals: Application to Hematological Traits
Source: PubMed Central journal article supplement (PMC3128100; doi:10.1371/journal.pgen.1002139), 2011-06-30
Supplement: pgen.1002139.s014.pdf [file pgen.1002139.s014.pdf]

**Table S7. Differentially expressed genes between *Pik3cg*<sup>-/-</sup> and wild type mice.**

| #  | Probe-ID | Gene                 | <i>Pik3cg</i> <sup>-/-</sup> (n=3) |        | Wild type (n=3) |        | log <sub>2</sub> -FC | FC    | P-value   |
|----|----------|----------------------|------------------------------------|--------|-----------------|--------|----------------------|-------|-----------|
|    |          |                      | Mean                               | sd     | Mean            | sd     |                      |       |           |
| 1  | 2635272  | <i>Igh-VJ558</i>     | 10.9383                            | 0.4107 | 8.6536          | 0.2362 | 2.285                | 4.873 | 1.123E-03 |
| 2  | 2846865  | <i>Actb</i>          | 10.7849                            | 0.3334 | 8.5469          | 0.1962 | 2.238                | 4.717 | 5.576E-04 |
| 3  | 2588055  | <i>Actb</i>          | 10.6790                            | 0.2479 | 8.5161          | 0.1759 | 2.163                | 4.478 | 2.490E-04 |
| 4  | 1226402  | <i>LOC331507</i>     | 11.0561                            | 0.4100 | 8.9195          | 0.2245 | 2.137                | 4.397 | 1.377E-03 |
| 5  | 2648661  | <i>Cap1</i>          | 9.8324                             | 0.1852 | 7.8609          | 0.0746 | 1.972                | 3.922 | 6.859E-05 |
| 6  | 2660754  | <i>Spnb1</i>         | 11.5861                            | 0.2838 | 10.0427         | 0.1154 | 1.543                | 2.915 | 9.499E-04 |
| 7  | 2434853  | <i>mtDNA_ND2</i>     | 11.9292                            | 0.3324 | 10.5779         | 0.4537 | 1.351                | 2.551 | 1.413E-02 |
| 8  | 2772264  | <i>Igh-VJ558</i>     | 9.4057                             | 0.1730 | 8.0732          | 0.1451 | 1.333                | 2.518 | 5.161E-04 |
| 9  | 1230858  | <i>9430065F12Rik</i> | 10.5905                            | 0.3804 | 9.2592          | 0.0696 | 1.331                | 2.516 | 3.972E-03 |
| 10 | 2624477  | <i>E2f2</i>          | 10.4032                            | 0.1284 | 9.2063          | 0.0898 | 1.197                | 2.293 | 1.884E-04 |
| 11 | 1216143  | <i>Rnf11</i>         | 13.7329                            | 0.2317 | 12.5869         | 0.1436 | 1.146                | 2.213 | 1.888E-03 |
| 12 | 1249344  | <i>2510006D16Rik</i> | 9.4496                             | 0.9088 | 8.3631          | 0.0232 | 1.086                | 2.124 | 1.072E-01 |
| 13 | 2705407  | <i>Pabpc1</i>        | 9.2546                             | 0.6745 | 8.1683          | 0.1240 | 1.086                | 2.123 | 5.171E-02 |
| 14 | 1214408  | <i>LOC666403</i>     | 9.7787                             | 1.9423 | 8.7006          | 0.0809 | 1.078                | 2.111 | 3.911E-01 |
| 15 | 1257767  | <i>E430014K09Rik</i> | 8.8017                             | 0.0575 | 7.7333          | 0.0294 | 1.068                | 2.097 | 8.860E-06 |
| 16 | 1233929  | <i>Psmf1</i>         | 13.1145                            | 0.1714 | 12.0549         | 0.0801 | 1.060                | 2.084 | 6.318E-04 |
| 17 | 2720813  | <i>Epb4.1</i>        | 11.5693                            | 0.4973 | 10.5321         | 0.2065 | 1.037                | 2.052 | 2.894E-02 |
| 18 | 3114413  | <i>G3bp2</i>         | 11.4849                            | 0.3002 | 10.4546         | 0.1420 | 1.030                | 2.042 | 5.794E-03 |
| 19 | 1241268  | <i>Snx3</i>          | 10.8379                            | 0.2128 | 9.8196          | 0.1785 | 1.018                | 2.026 | 3.150E-03 |
| 20 | 2698430  | <i>Bcl2l1</i>        | 9.8201                             | 0.7633 | 8.8199          | 0.2164 | 1.000                | 2.000 | 9.436E-02 |
| 21 | 2683128  | <i>Cmas</i>          | 13.7820                            | 0.4440 | 12.7996         | 0.3039 | 0.982                | 1.976 | 3.409E-02 |
| 22 | 2459979  | <i>Fancl</i>         | 9.0993                             | 0.2659 | 8.1226          | 0.0528 | 0.977                | 1.968 | 3.362E-03 |
| 23 | 2911760  | <i>Ubac1</i>         | 11.6110                            | 0.1664 | 10.6409         | 0.2460 | 0.970                | 1.959 | 4.812E-03 |
| 24 | 2666747  | <i>G3bp2</i>         | 9.2567                             | 0.4938 | 8.3037          | 0.0733 | 0.953                | 1.936 | 2.976E-02 |
| 25 | 2632206  | <i>Gnas</i>          | 10.6836                            | 0.4952 | 9.7392          | 0.1018 | 0.944                | 1.924 | 3.182E-02 |
| 26 | 2894450  | <i>Snx15</i>         | 11.7147                            | 0.2518 | 10.7811         | 0.2630 | 0.934                | 1.910 | 1.132E-02 |
| 27 | 1260103  | <i>LOC666904</i>     | 14.3019                            | 0.3975 | 13.3887         | 0.2117 | 0.913                | 1.883 | 2.463E-02 |
| 28 | 2969919  | <i>Rnf11</i>         | 14.5588                            | 0.2325 | 13.6472         | 0.1255 | 0.912                | 1.881 | 3.939E-03 |
| 29 | 2453695  | <i>Urod</i>          | 12.6295                            | 0.3807 | 11.7423         | 0.0647 | 0.887                | 1.850 | 1.641E-02 |
| 30 | 2622671  | <i>Acsl1</i>         | 9.3216                             | 0.4188 | 8.4621          | 0.1160 | 0.860                | 1.815 | 2.663E-02 |
| 31 | 2588411  | <i>Grina</i>         | 15.1590                            | 0.0817 | 14.3097         | 0.1321 | 0.849                | 1.802 | 6.938E-04 |
| 32 | 1255562  | <i>Fancl</i>         | 8.9004                             | 0.1910 | 8.0561          | 0.0449 | 0.844                | 1.795 | 1.730E-03 |
| 33 | 2962747  | <i>Fzr1</i>          | 11.9614                            | 0.2804 | 11.1277         | 0.2226 | 0.834                | 1.782 | 1.569E-02 |
| 34 | 2956895  | <i>Cul4a</i>         | 10.6666                            | 0.2442 | 9.8359          | 0.1071 | 0.831                | 1.779 | 5.711E-03 |
| 35 | 1259769  | <i>Pabpc1</i>        | 9.5486                             | 0.4774 | 8.7251          | 0.1611 | 0.824                | 1.770 | 4.729E-02 |
| 36 | 3116560  | <i>St3gal5</i>       | 10.8780                            | 0.2258 | 10.0574         | 0.1030 | 0.821                | 1.766 | 4.601E-03 |
| 37 | 1213070  | <i>1700037H04Rik</i> | 11.8912                            | 0.2351 | 11.0714         | 0.1019 | 0.820                | 1.765 | 5.185E-03 |
| 38 | 2939295  | <i>Fis1</i>          | 12.2089                            | 0.5195 | 11.4108         | 0.1927 | 0.798                | 1.739 | 6.713E-02 |
| 39 | 2713686  | <i>Pnpo</i>          | 9.0831                             | 0.7739 | 8.2924          | 0.1096 | 0.791                | 1.730 | 1.546E-01 |
| 40 | 2736762  | <i>lfrd2</i>         | 9.5116                             | 0.2988 | 8.7241          | 0.1702 | 0.788                | 1.726 | 1.657E-02 |
| 41 | 2746830  | <i>BC022224</i>      | 13.8552                            | 0.1850 | 13.0779         | 0.2047 | 0.777                | 1.714 | 8.161E-03 |

|    |         |                    |         |        |         |        |       |       |           |
|----|---------|--------------------|---------|--------|---------|--------|-------|-------|-----------|
| 42 | 2944601 | 4933439C20Rik      | 9.9683  | 0.2884 | 9.1956  | 0.0777 | 0.773 | 1.708 | 1.099E-02 |
| 43 | 2655260 | Ptp4a3             | 11.0441 | 0.2817 | 10.2739 | 0.1685 | 0.770 | 1.706 | 1.529E-02 |
| 44 | 1217767 | Glrx5              | 14.9998 | 0.1628 | 14.2389 | 0.1197 | 0.761 | 1.695 | 2.855E-03 |
| 45 | 2855792 | Pnpo               | 11.2950 | 0.2852 | 10.5477 | 0.1420 | 0.747 | 1.679 | 1.532E-02 |
| 46 | 3026397 | Chka               | 11.0370 | 0.0709 | 10.2926 | 0.1943 | 0.744 | 1.675 | 3.378E-03 |
| 47 | 1226372 | Rffl               | 9.3176  | 0.1234 | 8.5745  | 0.1069 | 0.743 | 1.674 | 1.400E-03 |
| 48 | 2939294 | Fis1               | 11.8499 | 0.3965 | 11.1082 | 0.2618 | 0.742 | 1.672 | 5.388E-02 |
| 49 | 2770819 | Rnf10              | 10.4975 | 0.4380 | 9.7562  | 0.0606 | 0.741 | 1.672 | 4.393E-02 |
| 50 | 2431046 | Ubac1              | 10.3293 | 0.2206 | 9.5890  | 0.2027 | 0.740 | 1.671 | 1.284E-02 |
| 51 | 1236577 | 2310045N01Rik      | 9.4111  | 0.0609 | 8.6769  | 0.0754 | 0.734 | 1.664 | 1.949E-04 |
| 52 | 2691567 | Hyi                | 8.7761  | 0.1367 | 8.0449  | 0.1035 | 0.731 | 1.660 | 1.790E-03 |
| 53 | 2958159 | Eno1               | 9.2303  | 0.2476 | 8.5026  | 0.0188 | 0.728 | 1.656 | 7.096E-03 |
| 54 | 2694782 | 2410076I21Rik      | 14.6397 | 0.1542 | 13.9149 | 0.0294 | 0.725 | 1.653 | 1.325E-03 |
| 55 | 2677712 | Arf5               | 9.5897  | 0.5985 | 8.8664  | 0.1245 | 0.723 | 1.651 | 1.098E-01 |
| 56 | 1234387 | Acp1               | 8.7540  | 0.4122 | 8.0571  | 0.1525 | 0.697 | 1.621 | 5.154E-02 |
| 57 | 2940642 | St6galnac2         | 8.4426  | 0.1862 | 7.7463  | 0.1026 | 0.696 | 1.620 | 4.763E-03 |
| 58 | 2656854 | Myo6               | 9.1095  | 0.1882 | 8.4192  | 0.0592 | 0.690 | 1.614 | 3.745E-03 |
| 59 | 2483948 | Specc1             | 13.0098 | 0.1772 | 12.3245 | 0.1838 | 0.685 | 1.608 | 9.663E-03 |
| 60 | 1241976 | Ubac1              | 9.6326  | 0.2404 | 8.9499  | 0.1999 | 0.683 | 1.605 | 1.941E-02 |
| 61 | 2860699 | Epb4.9             | 9.5381  | 0.1654 | 8.8585  | 0.1222 | 0.680 | 1.602 | 4.614E-03 |
| 62 | 2551648 | Mscp-pending       | 8.9890  | 0.1299 | 8.3099  | 0.0170 | 0.679 | 1.601 | 8.513E-04 |
| 63 | 2652187 | Cux1               | 10.3852 | 0.2232 | 9.7106  | 0.2137 | 0.675 | 1.596 | 1.942E-02 |
| 64 | 2767918 | Ifi30              | 9.2217  | 0.0853 | 8.5497  | 0.0969 | 0.672 | 1.593 | 8.379E-04 |
| 65 | 1228366 | Cdkn2c             | 9.7009  | 0.2510 | 9.0289  | 0.1665 | 0.672 | 1.593 | 1.808E-02 |
| 66 | 2606746 | Car2               | 9.7239  | 0.5358 | 9.0531  | 0.2742 | 0.671 | 1.592 | 1.258E-01 |
| 67 | 2653765 | Nusap1             | 12.6153 | 0.3736 | 11.9481 | 0.2863 | 0.667 | 1.588 | 7.003E-02 |
| 68 | 1249578 | Sorl1              | 8.9404  | 0.1175 | 8.2735  | 0.0482 | 0.667 | 1.588 | 8.094E-04 |
| 69 | 2605453 | Ranbp10            | 12.0146 | 0.1143 | 11.3487 | 0.0177 | 0.666 | 1.586 | 5.680E-04 |
| 70 | 2735615 | Isg20              | 11.5303 | 0.1583 | 10.8841 | 0.2082 | 0.646 | 1.565 | 1.285E-02 |
| 71 | 1217068 | Tusc1              | 9.9727  | 0.1396 | 9.3287  | 0.1806 | 0.644 | 1.563 | 8.124E-03 |
| 72 | 2445324 | LOC100047651       | 10.1668 | 0.0549 | 9.5257  | 0.0439 | 0.641 | 1.559 | 9.365E-05 |
| 73 | 1250068 | Atpif1             | 12.3942 | 0.3794 | 11.7544 | 0.3283 | 0.640 | 1.558 | 9.179E-02 |
| 74 | 2689986 | LOC100048331       | 10.9138 | 0.1351 | 10.2741 | 0.0511 | 0.640 | 1.558 | 1.552E-03 |
| 75 | 3123441 | OTTMUSG00000007855 | 11.6389 | 0.2728 | 11.0081 | 0.3050 | 0.631 | 1.548 | 5.578E-02 |
| 76 | 2742557 | Bcl2l1             | 8.9598  | 0.5473 | 8.3295  | 0.1079 | 0.630 | 1.548 | 1.220E-01 |
| 77 | 2732961 | Mff                | 10.2530 | 0.2997 | 9.6288  | 0.1780 | 0.624 | 1.541 | 3.615E-02 |
| 78 | 1228534 | Fech               | 11.4882 | 0.5271 | 10.8670 | 0.2157 | 0.621 | 1.538 | 1.319E-01 |
| 79 | 1245717 | Epb4.9             | 9.6578  | 0.1658 | 9.0386  | 0.0792 | 0.619 | 1.536 | 4.297E-03 |
| 80 | 1223437 | Gnas               | 9.3254  | 0.4820 | 8.7073  | 0.1782 | 0.618 | 1.535 | 1.056E-01 |
| 81 | 2536676 | LOC383981          | 14.0264 | 0.4834 | 13.4096 | 0.1255 | 0.617 | 1.533 | 9.919E-02 |
| 82 | 1231718 | 1810027O10Rik      | 13.0472 | 0.1569 | 12.4307 | 0.1688 | 0.616 | 1.533 | 9.785E-03 |
| 83 | 1258682 | Map2k2             | 10.7572 | 0.0886 | 10.1442 | 0.1188 | 0.613 | 1.529 | 2.010E-03 |
| 84 | 2719498 | 2700055A20Rik      | 11.2060 | 0.2506 | 10.5939 | 0.2178 | 0.612 | 1.528 | 3.313E-02 |
| 85 | 2684205 | 4930431B09Rik      | 10.6637 | 0.3649 | 10.0534 | 0.1256 | 0.610 | 1.527 | 5.195E-02 |
| 86 | 2550089 | 2010001F03Rik      | 11.4219 | 0.3122 | 10.8123 | 0.1595 | 0.610 | 1.526 | 3.947E-02 |

|     |         |                      |         |        |         |        |        |        |           |
|-----|---------|----------------------|---------|--------|---------|--------|--------|--------|-----------|
| 87  | 2597030 | <i>Smox</i>          | 13.0159 | 0.2549 | 12.4085 | 0.0698 | 0.607  | 1.524  | 1.638E-02 |
| 88  | 2939503 | <i>Ttc39a</i>        | 9.6160  | 0.2541 | 9.0100  | 0.0964 | 0.606  | 1.522  | 1.812E-02 |
| 89  | 2710731 | <i>Fech</i>          | 10.4295 | 0.5433 | 9.8240  | 0.3346 | 0.606  | 1.522  | 1.756E-01 |
| 90  | 2477324 | <i>Trim10</i>        | 9.1685  | 0.7541 | 8.5643  | 0.1257 | 0.604  | 1.520  | 2.429E-01 |
| 91  | 1250752 | <i>Knsl5</i>         | 10.2142 | 0.2997 | 9.6140  | 0.0265 | 0.600  | 1.516  | 2.594E-02 |
| 92  | 1218380 | <i>Hist2h2ac</i>     | 12.2579 | 0.1184 | 11.6603 | 0.2141 | 0.598  | 1.513  | 1.337E-02 |
| 93  | 2695008 | <i>Ncoa4</i>         | 11.3031 | 0.7025 | 10.7058 | 0.2862 | 0.597  | 1.513  | 2.443E-01 |
| 94  | 2647885 | <i>Bcl2l1</i>        | 8.8706  | 0.7009 | 8.2752  | 0.0651 | 0.595  | 1.511  | 2.168E-01 |
| 95  | 1219904 | <i>Tspan33</i>       | 11.7388 | 0.1691 | 11.1451 | 0.1542 | 0.594  | 1.509  | 1.088E-02 |
| 96  | 1228630 | <i>Psm4</i>          | 13.4905 | 0.0375 | 12.9003 | 0.1433 | 0.590  | 1.505  | 2.312E-03 |
| 97  | 1225372 | <i>Tsc1</i>          | 10.0412 | 0.0725 | 9.4560  | 0.0547 | 0.585  | 1.500  | 3.661E-04 |
| 98  | 2628188 | <i>Fgfr1op2</i>      | 8.1632  | 0.0477 | 8.7493  | 0.1361 | -0.586 | -1.501 | 2.148E-03 |
| 99  | 2719202 | <i>Hist1h2bf</i>     | 9.8002  | 0.7070 | 10.3884 | 0.2952 | -0.588 | -1.503 | 2.544E-01 |
| 100 | 1240381 | <i>Plp1</i>          | 8.5815  | 0.4493 | 9.1699  | 0.1319 | -0.588 | -1.504 | 9.515E-02 |
| 101 | 1257575 | <i>Cst3</i>          | 11.5501 | 0.1951 | 12.1427 | 0.3560 | -0.593 | -1.508 | 6.477E-02 |
| 102 | 2981167 | <i>lfit2</i>         | 8.3334  | 0.0461 | 8.9281  | 0.0723 | -0.595 | -1.510 | 2.759E-04 |
| 103 | 2780205 | <i>Ctnna1</i>        | 9.3237  | 0.1664 | 9.9229  | 0.2526 | -0.599 | -1.515 | 2.651E-02 |
| 104 | 2431807 | <i>2610024E20Rik</i> | 9.0752  | 0.1729 | 9.6785  | 0.1085 | -0.603 | -1.519 | 6.889E-03 |
| 105 | 2742592 | <i>Hist1h2be</i>     | 9.8197  | 0.5963 | 10.4280 | 0.3595 | -0.608 | -1.524 | 2.048E-01 |
| 106 | 1221564 | <i>Ltbp1</i>         | 8.3024  | 0.2824 | 8.9129  | 0.2117 | -0.610 | -1.527 | 4.011E-02 |
| 107 | 2762944 | <i>lfi27</i>         | 10.2634 | 0.1931 | 10.8776 | 0.3627 | -0.614 | -1.531 | 6.076E-02 |
| 108 | 1219717 | <i>Sort1</i>         | 8.7696  | 0.1896 | 9.3841  | 0.1569 | -0.615 | -1.531 | 1.240E-02 |
| 109 | 2637624 | <i>1810055E12Rik</i> | 8.2040  | 0.0169 | 8.8199  | 0.0940 | -0.616 | -1.532 | 3.660E-04 |
| 110 | 1252995 | <i>Hist1h2be</i>     | 10.5749 | 0.4578 | 11.1910 | 0.3286 | -0.616 | -1.533 | 1.312E-01 |
| 111 | 2733179 | <i>Aldh2</i>         | 12.4886 | 0.5356 | 13.1051 | 0.4290 | -0.617 | -1.533 | 1.947E-01 |
| 112 | 2840082 | <i>P2ry12</i>        | 9.5380  | 0.6190 | 10.1613 | 0.0990 | -0.623 | -1.540 | 1.601E-01 |
| 113 | 1239765 | <i>Prdx5</i>         | 10.1813 | 0.0840 | 10.8070 | 0.2086 | -0.626 | -1.543 | 8.529E-03 |
| 114 | 2546073 | <i>Wdr68</i>         | 8.2600  | 0.1392 | 8.8857  | 0.0175 | -0.626 | -1.543 | 1.512E-03 |
| 115 | 1237208 | <i>Lamp1</i>         | 9.4342  | 0.1305 | 10.0615 | 0.1946 | -0.627 | -1.545 | 9.755E-03 |
| 116 | 2946466 | <i>Bin1</i>          | 10.2007 | 0.5967 | 10.8304 | 0.2866 | -0.630 | -1.547 | 1.748E-01 |
| 117 | 2731735 | <i>Ear2</i>          | 9.2701  | 0.2490 | 9.9010  | 0.7466 | -0.631 | -1.549 | 2.373E-01 |
| 118 | 1231492 | <i>ltga6</i>         | 8.0642  | 0.1105 | 8.6954  | 0.1391 | -0.631 | -1.549 | 3.531E-03 |
| 119 | 2732229 | <i>Prdx3</i>         | 7.9979  | 0.1076 | 8.6296  | 0.0046 | -0.632 | -1.549 | 5.283E-04 |
| 120 | 1250195 | <i>Ndr1</i>          | 8.9151  | 0.4948 | 9.5479  | 0.2487 | -0.633 | -1.551 | 1.189E-01 |
| 121 | 2458275 | <i>Ubp1</i>          | 9.4274  | 0.4923 | 10.0610 | 0.2137 | -0.634 | -1.551 | 1.103E-01 |
| 122 | 2622804 | <i>Sh3bgrl2</i>      | 8.9118  | 0.4941 | 9.5467  | 0.2125 | -0.635 | -1.553 | 1.104E-01 |
| 123 | 2590950 | <i>Agtrap</i>        | 8.0937  | 0.0717 | 8.7338  | 0.0973 | -0.640 | -1.558 | 7.844E-04 |
| 124 | 2687905 | <i>Msi2</i>          | 8.3328  | 0.0570 | 8.9750  | 0.2477 | -0.642 | -1.561 | 1.191E-02 |
| 125 | 1235499 | <i>Pros1</i>         | 8.8024  | 0.3963 | 9.4476  | 0.2794 | -0.645 | -1.564 | 8.251E-02 |
| 126 | 1230137 | <i>Tpi1</i>          | 9.5938  | 0.3570 | 10.2407 | 0.2419 | -0.647 | -1.566 | 6.013E-02 |
| 127 | 2842137 | <i>llk</i>           | 10.4440 | 0.4787 | 11.0950 | 0.3619 | -0.651 | -1.570 | 1.335E-01 |
| 128 | 2492403 | <i>Cd151</i>         | 9.1555  | 0.5744 | 9.8094  | 0.2786 | -0.654 | -1.573 | 1.507E-01 |
| 129 | 2514292 | <i>Zyx</i>           | 12.5377 | 0.4208 | 13.1956 | 0.4135 | -0.658 | -1.578 | 1.256E-01 |
| 130 | 2750864 | <i>2210013O21Rik</i> | 9.4150  | 0.4138 | 10.0732 | 0.2131 | -0.658 | -1.578 | 7.049E-02 |
| 131 | 2645208 | <i>Arhgef3</i>       | 10.3761 | 0.3512 | 11.0344 | 0.1133 | -0.658 | -1.578 | 3.656E-02 |

|     |         |                      |         |        |         |        |        |        |           |
|-----|---------|----------------------|---------|--------|---------|--------|--------|--------|-----------|
| 132 | 2712986 | <i>Chi3l3</i>        | 9.0728  | 0.0833 | 9.7314  | 0.2256 | -0.659 | -1.579 | 9.016E-03 |
| 133 | 2757966 | <i>Cxcl4</i>         | 13.5809 | 0.7345 | 14.2412 | 0.2195 | -0.660 | -1.580 | 2.100E-01 |
| 134 | 1226017 | <i>2610035D17Rik</i> | 7.8684  | 0.1393 | 8.5308  | 0.1684 | -0.662 | -1.583 | 6.299E-03 |
| 135 | 2684855 | <i>Gpx4</i>          | 11.5126 | 0.3916 | 12.1758 | 0.1442 | -0.663 | -1.584 | 5.124E-02 |
| 136 | 2652181 | <i>Mast2</i>         | 8.9298  | 0.2566 | 9.5938  | 0.1379 | -0.664 | -1.584 | 1.684E-02 |
| 137 | 1247377 | <i>Mpeg1</i>         | 9.8823  | 0.0992 | 10.5470 | 0.5911 | -0.665 | -1.585 | 1.271E-01 |
| 138 | 2595200 | <i>1110012O05Rik</i> | 10.4346 | 0.5198 | 11.1033 | 0.2152 | -0.669 | -1.590 | 1.086E-01 |
| 139 | 2950957 | <i>Rtn4ip1</i>       | 8.4451  | 0.1783 | 9.1157  | 0.1650 | -0.671 | -1.592 | 8.771E-03 |
| 140 | 1246770 | <i>Ybx3</i>          | 8.7271  | 0.0456 | 9.4036  | 0.2005 | -0.676 | -1.598 | 4.685E-03 |
| 141 | 2458274 | <i>Ubap1</i>         | 9.4088  | 0.5923 | 10.0854 | 0.1933 | -0.677 | -1.598 | 1.331E-01 |
| 142 | 2710905 | <i>S100a8</i>        | 12.9048 | 0.4031 | 13.5826 | 0.1711 | -0.678 | -1.600 | 5.519E-02 |
| 143 | 2538422 | <i>Adap1</i>         | 8.1268  | 0.1656 | 8.8076  | 0.2745 | -0.681 | -1.603 | 2.124E-02 |
| 144 | 2747754 | <i>Pygb</i>          | 8.4850  | 0.2183 | 9.1689  | 0.1684 | -0.684 | -1.606 | 1.269E-02 |
| 145 | 1250279 | <i>Serpib6a</i>      | 9.3718  | 0.6622 | 10.0563 | 0.3103 | -0.685 | -1.607 | 1.803E-01 |
| 146 | 2592823 | <i>Cdc42ep5</i>      | 8.9789  | 0.5241 | 9.6651  | 0.1753 | -0.686 | -1.609 | 9.791E-02 |
| 147 | 2836710 | <i>Cd151</i>         | 9.1602  | 0.5446 | 9.8464  | 0.3940 | -0.686 | -1.609 | 1.518E-01 |
| 148 | 1233187 | <i>LOC100048299</i>  | 10.7643 | 0.4122 | 11.4549 | 0.1689 | -0.691 | -1.614 | 5.495E-02 |
| 149 | 1232762 | <i>Atox1</i>         | 9.6402  | 0.4374 | 10.3369 | 0.1716 | -0.697 | -1.621 | 6.209E-02 |
| 150 | 2700233 | <i>Ccng2</i>         | 8.2620  | 0.1820 | 8.9647  | 0.0518 | -0.703 | -1.628 | 3.003E-03 |
| 151 | 1234812 | <i>Dap</i>           | 10.9603 | 0.7642 | 11.6649 | 0.3346 | -0.705 | -1.630 | 2.174E-01 |
| 152 | 1258526 | <i>Lgals3bp</i>      | 8.8086  | 0.1111 | 9.5179  | 0.1312 | -0.709 | -1.635 | 2.029E-03 |
| 153 | 2419138 | <i>Vcl</i>           | 9.0342  | 0.3557 | 9.7451  | 0.2759 | -0.711 | -1.637 | 5.218E-02 |
| 154 | 2640560 | <i>Gp6</i>           | 8.6053  | 0.4417 | 9.3166  | 0.2025 | -0.711 | -1.637 | 6.431E-02 |
| 155 | 1232435 | <i>Mmrn1</i>         | 8.3081  | 0.2839 | 9.0209  | 0.2437 | -0.713 | -1.639 | 2.995E-02 |
| 156 | 1242399 | <i>Hist1h2bc</i>     | 12.1589 | 0.4955 | 12.8755 | 0.1647 | -0.717 | -1.643 | 7.624E-02 |
| 157 | 2952914 | <i>Ywhaz</i>         | 11.4152 | 0.0953 | 12.1368 | 0.0274 | -0.722 | -1.649 | 2.284E-04 |
| 158 | 2646166 | <i>Ndr1</i>          | 8.6214  | 0.2293 | 9.3451  | 0.0937 | -0.724 | -1.651 | 7.176E-03 |
| 159 | 1252157 | <i>A330102K04Rik</i> | 13.5734 | 0.9188 | 14.2979 | 0.6078 | -0.724 | -1.652 | 3.183E-01 |
| 160 | 2645255 | <i>Stx7</i>          | 8.7248  | 0.1562 | 9.4516  | 0.1456 | -0.727 | -1.655 | 4.143E-03 |
| 161 | 1225422 | <i>LOC100048807</i>  | 8.7581  | 0.4868 | 9.4896  | 0.1066 | -0.731 | -1.660 | 6.382E-02 |
| 162 | 1224768 | <i>Ehd4</i>          | 9.8930  | 0.5214 | 10.6293 | 0.3095 | -0.736 | -1.666 | 1.033E-01 |
| 163 | 1219686 | <i>Esd</i>           | 10.3885 | 0.4719 | 11.1303 | 0.0428 | -0.742 | -1.672 | 5.343E-02 |
| 164 | 3155180 | <i>Itpr2</i>         | 9.6937  | 0.1954 | 10.4394 | 0.2164 | -0.746 | -1.677 | 1.142E-02 |
| 165 | 1248713 | <i>F5</i>            | 8.6214  | 0.3168 | 9.3699  | 0.0739 | -0.748 | -1.680 | 1.633E-02 |
| 166 | 2712280 | <i>Ormdl3</i>        | 8.9933  | 0.3808 | 9.7463  | 0.3691 | -0.753 | -1.685 | 6.972E-02 |
| 167 | 3160863 | <i>Dusp23</i>        | 9.2086  | 0.6830 | 9.9642  | 0.2304 | -0.756 | -1.688 | 1.436E-01 |
| 168 | 2990616 | <i>Birc2</i>         | 9.7443  | 0.5443 | 10.5005 | 0.1839 | -0.756 | -1.689 | 8.481E-02 |
| 169 | 2515363 | <i>Tpm4</i>          | 12.0100 | 0.6358 | 12.7699 | 0.2713 | -0.760 | -1.693 | 1.296E-01 |
| 170 | 2469294 | <i>Bicd2</i>         | 9.9262  | 0.3332 | 10.6884 | 0.2974 | -0.762 | -1.696 | 4.171E-02 |
| 171 | 2650106 | <i>6330578E17Rik</i> | 9.8499  | 0.3653 | 10.6176 | 0.2887 | -0.768 | -1.703 | 4.611E-02 |
| 172 | 2591082 | <i>Nsep1</i>         | 10.8548 | 0.2178 | 11.6232 | 0.1511 | -0.768 | -1.703 | 7.377E-03 |
| 173 | 2759484 | <i>C3</i>            | 8.7098  | 0.1640 | 9.4801  | 0.6437 | -0.770 | -1.706 | 1.150E-01 |
| 174 | 3161289 | <i>Gnaz</i>          | 8.8505  | 0.4783 | 9.6228  | 0.3457 | -0.772 | -1.708 | 8.606E-02 |
| 175 | 2622801 | <i>Sh3bgrl2</i>      | 9.0326  | 0.5866 | 9.8125  | 0.2177 | -0.780 | -1.717 | 9.699E-02 |
| 176 | 2663613 | <i>Itgb5</i>         | 9.0924  | 0.5609 | 9.8731  | 0.2064 | -0.781 | -1.718 | 8.644E-02 |

|     |         |                      |         |        |         |        |        |        |           |
|-----|---------|----------------------|---------|--------|---------|--------|--------|--------|-----------|
| 177 | 2598374 | <i>Ccdc92</i>        | 8.7812  | 0.3893 | 9.5627  | 0.3246 | -0.782 | -1.719 | 5.578E-02 |
| 178 | 1251233 | <i>Gng11</i>         | 10.0192 | 0.6797 | 10.8141 | 0.1654 | -0.795 | -1.735 | 1.204E-01 |
| 179 | 3001598 | <i>Ptpn11</i>        | 10.5486 | 0.4101 | 11.3470 | 0.3227 | -0.798 | -1.739 | 5.699E-02 |
| 180 | 3120510 | <i>Gvin1</i>         | 10.4878 | 0.3719 | 11.2866 | 0.6584 | -0.799 | -1.740 | 1.413E-01 |
| 181 | 1241827 | <i>Slc44a1</i>       | 8.2615  | 0.1153 | 9.0653  | 0.2054 | -0.804 | -1.746 | 4.101E-03 |
| 182 | 2751935 | <i>Sytl4</i>         | 8.6709  | 0.3722 | 9.4819  | 0.3566 | -0.811 | -1.754 | 5.271E-02 |
| 183 | 2744603 | <i>Gchfr</i>         | 9.6141  | 0.6956 | 10.4303 | 0.3433 | -0.816 | -1.761 | 1.425E-01 |
| 184 | 2694569 | <i>LOC631037</i>     | 9.7117  | 0.2940 | 10.5284 | 0.1441 | -0.817 | -1.761 | 1.244E-02 |
| 185 | 3005873 | <i>Sort1</i>         | 8.7744  | 0.1551 | 9.5921  | 0.1303 | -0.818 | -1.763 | 2.202E-03 |
| 186 | 1248811 | <i>Ctla2b</i>        | 10.4414 | 0.7016 | 11.2602 | 0.1472 | -0.819 | -1.764 | 1.190E-01 |
| 187 | 1216746 | <i>B2m</i>           | 14.4432 | 0.2181 | 15.2755 | 0.3463 | -0.832 | -1.781 | 2.439E-02 |
| 188 | 2753096 | <i>Zfand3</i>        | 9.8994  | 0.4076 | 10.7369 | 0.2072 | -0.837 | -1.787 | 3.378E-02 |
| 189 | 2499264 | <i>4933428A15Rik</i> | 8.8469  | 0.3696 | 9.6894  | 0.2089 | -0.842 | -1.793 | 2.637E-02 |
| 190 | 2625351 | <i>Sh3bgrl3</i>      | 11.6962 | 0.4012 | 12.5402 | 0.2307 | -0.844 | -1.795 | 3.424E-02 |
| 191 | 2688236 | <i>Atp2a3</i>        | 9.8691  | 0.4051 | 10.7155 | 0.1226 | -0.846 | -1.798 | 2.573E-02 |
| 192 | 2616565 | <i>Slc2a3</i>        | 10.2500 | 0.5174 | 11.1118 | 0.3165 | -0.862 | -1.817 | 6.961E-02 |
| 193 | 2693403 | <i>Ela1</i>          | 9.2674  | 0.6268 | 10.1292 | 0.2428 | -0.862 | -1.817 | 9.054E-02 |
| 194 | 1230546 | <i>Clic4</i>         | 9.1779  | 0.5320 | 10.0534 | 0.2529 | -0.876 | -1.835 | 6.168E-02 |
| 195 | 2718662 | <i>Myl9</i>          | 9.3668  | 0.8261 | 10.2562 | 0.3640 | -0.889 | -1.852 | 1.631E-01 |
| 196 | 1225158 | <i>1110003E01Rik</i> | 11.0285 | 0.2075 | 11.9184 | 0.0655 | -0.890 | -1.853 | 2.095E-03 |
| 197 | 2801683 | <i>Dstn</i>          | 8.9351  | 0.1108 | 9.8283  | 0.1998 | -0.893 | -1.857 | 2.482E-03 |
| 198 | 2939681 | <i>Lyzs</i>          | 12.0444 | 0.1746 | 12.9403 | 0.4344 | -0.896 | -1.861 | 2.952E-02 |
| 199 | 2988143 | <i>Plac8</i>         | 10.8462 | 0.1791 | 11.7442 | 0.5383 | -0.898 | -1.864 | 5.181E-02 |
| 200 | 2739999 | <i>B2m</i>           | 14.3519 | 0.2851 | 15.2541 | 0.3380 | -0.902 | -1.869 | 2.415E-02 |
| 201 | 2806159 | <i>Tmsb4x</i>        | 14.6266 | 0.6830 | 15.5480 | 0.1729 | -0.921 | -1.894 | 8.618E-02 |
| 202 | 2936671 | <i>Skap2</i>         | 10.2520 | 0.2965 | 11.1744 | 0.2190 | -0.922 | -1.895 | 1.231E-02 |
| 203 | 3117381 | <i>Fhl1</i>          | 9.2981  | 0.6969 | 10.2344 | 0.2760 | -0.936 | -1.914 | 9.651E-02 |
| 204 | 2966722 | <i>Ywhah</i>         | 12.0501 | 0.8297 | 12.9973 | 0.3968 | -0.947 | -1.928 | 1.490E-01 |
| 205 | 2682800 | <i>Cox5a</i>         | 10.2564 | 0.2319 | 11.2073 | 0.1506 | -0.951 | -1.933 | 3.987E-03 |
| 206 | 2687547 | <i>Sdpr</i>          | 9.1087  | 0.6505 | 10.0639 | 0.3364 | -0.955 | -1.939 | 8.678E-02 |
| 207 | 2631093 | <i>Cd81</i>          | 10.7176 | 0.3331 | 11.6746 | 0.3012 | -0.957 | -1.941 | 2.099E-02 |
| 208 | 1218347 | <i>Mylk</i>          | 10.2077 | 0.7622 | 11.1696 | 0.3703 | -0.962 | -1.948 | 1.207E-01 |
| 209 | 2746283 | <i>Mrv1</i>          | 8.6849  | 0.4854 | 9.6577  | 0.3212 | -0.973 | -1.963 | 4.435E-02 |
| 210 | 2771380 | <i>Cd52</i>          | 8.3865  | 0.4565 | 9.3603  | 0.2329 | -0.974 | -1.964 | 3.019E-02 |
| 211 | 1252076 | <i>Lyz2</i>          | 10.2350 | 0.4266 | 11.2214 | 0.2998 | -0.986 | -1.981 | 3.059E-02 |
| 212 | 1245845 | <i>A530055J02Rik</i> | 7.7973  | 0.0277 | 8.7844  | 0.1266 | -0.987 | -1.982 | 1.909E-04 |
| 213 | 2842601 | <i>Gp9</i>           | 10.2792 | 0.8559 | 11.2756 | 0.3335 | -0.996 | -1.995 | 1.335E-01 |
| 214 | 2725414 | <i>Cd9</i>           | 9.7728  | 0.8312 | 10.7740 | 0.3086 | -1.001 | -2.002 | 1.222E-01 |
| 215 | 2699531 | <i>Rgs10</i>         | 11.9318 | 0.7077 | 12.9373 | 0.2596 | -1.005 | -2.008 | 8.200E-02 |
| 216 | 2734340 | <i>Stx11</i>         | 11.1232 | 0.8572 | 12.1387 | 0.3175 | -1.016 | -2.022 | 1.267E-01 |
| 217 | 2878071 | <i>Lyz</i>           | 14.0839 | 0.0375 | 15.1021 | 0.4954 | -1.018 | -2.025 | 2.380E-02 |
| 218 | 2674575 | <i>Mmd</i>           | 11.2576 | 0.8966 | 12.2936 | 0.2648 | -1.036 | -2.051 | 1.274E-01 |
| 219 | 1249498 | <i>Plek</i>          | 10.2776 | 0.6284 | 11.3178 | 0.2050 | -1.040 | -2.057 | 5.267E-02 |
| 220 | 1236465 | <i>F2rl2</i>         | 8.1269  | 0.0825 | 9.1746  | 0.2743 | -1.048 | -2.067 | 3.176E-03 |
| 221 | 1226555 | <i>5430417L22Rik</i> | 9.8597  | 0.6286 | 10.9108 | 0.2308 | -1.051 | -2.072 | 5.306E-02 |

|     |         |                      |         |        |         |        |        |        |           |
|-----|---------|----------------------|---------|--------|---------|--------|--------|--------|-----------|
| 222 | 2907793 | <i>Nptn</i>          | 12.4020 | 0.7841 | 13.4558 | 0.2791 | -1.054 | -2.076 | 9.337E-02 |
| 223 | 2713285 | <i>Fhl1</i>          | 9.3013  | 0.7018 | 10.3633 | 0.3706 | -1.062 | -2.088 | 8.134E-02 |
| 224 | 1228102 | <i>Ppbb</i>          | 10.6549 | 1.0629 | 11.7412 | 0.2450 | -1.086 | -2.123 | 1.596E-01 |
| 225 | 2665490 | <i>Litaf</i>         | 10.9058 | 0.8011 | 12.0022 | 0.2267 | -1.096 | -2.138 | 8.471E-02 |
| 226 | 2616309 | <i>Pttg1ip</i>       | 11.4681 | 0.7800 | 12.5788 | 0.4606 | -1.111 | -2.160 | 1.009E-01 |
| 227 | 2855315 | <i>Hist1h1c</i>      | 11.2302 | 0.5430 | 12.3574 | 0.3281 | -1.127 | -2.184 | 3.702E-02 |
| 228 | 1219471 | <i>Mylk</i>          | 9.3789  | 0.6359 | 10.5163 | 0.3178 | -1.137 | -2.200 | 5.026E-02 |
| 229 | 2653205 | <i>Gp1bb</i>         | 9.4816  | 0.8179 | 10.6210 | 0.3180 | -1.139 | -2.203 | 8.775E-02 |
| 230 | 2613908 | <i>Alox12</i>        | 11.8218 | 0.9986 | 12.9655 | 0.3984 | -1.144 | -2.210 | 1.392E-01 |
| 231 | 2761109 | <i>Clic4</i>         | 11.2222 | 0.8243 | 12.3756 | 0.4195 | -1.153 | -2.224 | 9.690E-02 |
| 232 | 2954868 | <i>Oasl2</i>         | 10.2000 | 0.5292 | 11.3953 | 0.8012 | -1.195 | -2.290 | 9.732E-02 |
| 233 | 2855310 | <i>Mpl</i>           | 9.1397  | 0.5518 | 10.3531 | 0.3863 | -1.213 | -2.319 | 3.552E-02 |
| 234 | 1246808 | <i>Serpine2</i>      | 8.5707  | 0.3748 | 9.7998  | 0.3948 | -1.229 | -2.344 | 1.739E-02 |
| 235 | 2523169 | <i>Trem1</i>         | 10.6343 | 0.8678 | 11.8864 | 0.3716 | -1.252 | -2.382 | 8.319E-02 |
| 236 | 3161372 | <i>AU023871</i>      | 9.9055  | 0.8380 | 11.2534 | 0.3782 | -1.348 | -2.545 | 6.402E-02 |
| 237 | 2519673 | <i>Vwf</i>           | 9.7469  | 0.7749 | 11.1276 | 0.4640 | -1.381 | -2.604 | 5.712E-02 |
| 238 | 2908435 | <i>Ppbb</i>          | 12.7856 | 0.9772 | 14.1747 | 0.3658 | -1.389 | -2.619 | 8.241E-02 |
| 239 | 2730100 | <i>Cib3</i>          | 7.7474  | 0.0976 | 9.1422  | 0.2396 | -1.395 | -2.630 | 7.324E-04 |
| 240 | 2727153 | <i>LOC100046120</i>  | 10.5224 | 0.9927 | 11.9364 | 0.4158 | -1.414 | -2.665 | 8.521E-02 |
| 241 | 2774537 | <i>Hist1h1c</i>      | 11.4908 | 0.5157 | 12.9316 | 0.3161 | -1.441 | -2.715 | 1.454E-02 |
| 242 | 1253819 | <i>Prkar2b</i>       | 9.7177  | 0.4990 | 11.2201 | 0.1257 | -1.502 | -2.833 | 7.195E-03 |
| 243 | 2467007 | <i>2810484G07Rik</i> | 11.2090 | 0.9766 | 12.7177 | 0.2887 | -1.509 | -2.846 | 6.225E-02 |
| 244 | 1236762 | <i>Gp5</i>           | 9.6844  | 0.7649 | 11.3673 | 0.3295 | -1.683 | -3.211 | 2.490E-02 |
| 245 | 2450735 | <i>Rn18s</i>         | 13.6123 | 0.9507 | 15.6042 | 0.7135 | -1.992 | -3.978 | 4.400E-02 |
| 246 | 1218799 | <i>Emb</i>           | 7.8593  | 0.0961 | 9.9252  | 0.1289 | -2.066 | -4.187 | 2.414E-05 |
| 247 | 2615468 | <i>Fgfr1op2</i>      | 8.3577  | 0.0660 | 11.3018 | 0.0878 | -2.944 | -7.696 | 1.287E-06 |

Differentially expressed transcripts between knockout and wild type mice were identified by calculating the  $\log_2$ - and fold-changes (FC) of the averaged expression values. *P*-values were calculated by 1-way analysis of variance (ANOVA). Only transcripts with fold-changes of  $\geq 1.5$  and  $\leq -1.5$  are shown.
