# Supplementary material for: Maps of Open Chromatin Guide the Functional Follow-Up of Genome-Wide Association Signals: Application to Hematological Traits
Source: PubMed Central journal article supplement (PMC3128100; doi:10.1371/journal.pgen.1002139), 2011-06-30
Supplement: pgen.1002139.s015.pdf [file pgen.1002139.s015.pdf]

**Table S8. Functional ontology classification of differentially expressed genes between *Pik3cg*<sup>-/-</sup> and wild type mice.**

| # | GO term | Biological process               | P-value  | Sample frequency | Background frequency | Genes                                                                                                                                                                                                                                                                                                                                                                                                                                                                                                                                                                                                                                                                                                                                                                                                                                                                                |
|---|---------|----------------------------------|----------|------------------|----------------------|--------------------------------------------------------------------------------------------------------------------------------------------------------------------------------------------------------------------------------------------------------------------------------------------------------------------------------------------------------------------------------------------------------------------------------------------------------------------------------------------------------------------------------------------------------------------------------------------------------------------------------------------------------------------------------------------------------------------------------------------------------------------------------------------------------------------------------------------------------------------------------------|
| 1 | 0009987 | Cellular process                 | 3.86E-16 | 123/187 (65.8%)  | 11382/33954 (33.5%)  | <i>Tsc1, Rgs10, Tmsb4x, Cst3, Ybx1, Psmd4, Ywhah, Snx15, Fech, Myo6, Map2k2, Acp1, Hist2h2ac, Smox, Atpif1, Ccng2, Gng11, Hist1h1c, Cdkn2c, Glrx5, Bicd2, Clic4, Cela1, C3, Lyz2, Cul4a, Gpx4, Rnf10, Cd81, Sh3bgrl3, Ifit2, Csda, Atp2a3, Car2, Cap1, Bcl2l1, Stx7, Fzr1, Skap2, Dstn, Sorl1, Cmas, Ctnna1, Prdx3, Chka, Acsl1, Ilk, Sytl4, Msi2, Alox12, Nptn, Arhgef3, Vwf, Atox1, Birc2, Actb, F2rl2, Serpine2, Rnf11, Dusp23, Slc44a1, Sdpr, Itpr2, Itgb5, Rffl, Ptp4a3, Pabpc1, Ywhaz, Ifi30, Zyx, Mmd, Plp1, St3gal5, Prdx5, Tpi1, Ehd4, Fancl, Lyz1, Sort1, Gnaz, Fis1, Litaf, Prkar2b, Cux1, Trem1, Lgals3bp, Gp9, Nusap1, Fhl1, F5, Pros1, Ranbp10, Emb, P2ry12, Urod, Gnas, St6galnac2, Itga6, Cdc42ep5, Cd9, Trim10, Arf5, Gp1bb, Snx3, Pygb, Mylk, Dap, Bin1, Epb4.1, Stx11, Spnb1, Ptpn11, Agrtrap, Slc2a3, G3bp2, Mast2, Epb4.9, Plek, Ndr1, Gp5, Pnpo, E2f2, Vcl</i> |
| 2 | 0065008 | Regulation of biological quality | 2.64E-14 | 41/187 (21.9%)   | 1503/33954 (4.4%)    | <i>Tsc1, Tmsb4x, Fech, Myo6, Glrx5, C3, Rnf10, Cd81, Sh3bgrl3, Car2, Dstn, Prdx3, Ilk, Sytl4, Alox12, Nptn, Gp6, Vwf, Atox1, F2rl2, Serpine2, Ywhaz, Ifi30, Plp1, Prdx5, Trem1, Gp9, F5, Pros1, P2ry12, Cdc42ep5, Cd9, Trim10, Gp1bb, Epb4.1, Spnb1, Ptpn11, Agrtrap, Epb4.9, Plek, Gp5</i>                                                                                                                                                                                                                                                                                                                                                                                                                                                                                                                                                                                          |
| 3 | 0007596 | Blood coagulation                | 7.84E-12 | 13/187 (7.0%)    | 91/33954 (0.3%)      | <i>C3, Gp6, Vwf, F2rl2, Serpine2, Trem1, Gp9, F5, Pros1, P2ry12, Gp1bb, Plek, Gp5</i>                                                                                                                                                                                                                                                                                                                                                                                                                                                                                                                                                                                                                                                                                                                                                                                                |
| 4 | 0007599 | Hemostasis                       | 9.09E-12 | 13/187 (7.0%)    | 92/33954 (0.3%)      | <i>C3, Gp6, Vwf, F2rl2, Serpine2, Trem1, Gp9, F5, Pros1, P2ry12, Gp1bb, Plek, Gp5</i>                                                                                                                                                                                                                                                                                                                                                                                                                                                                                                                                                                                                                                                                                                                                                                                                |
| 5 | 0050817 | Coagulation                      | 1.21E-11 | 13/187 (7.0%)    | 94/33954 (0.3%)      | <i>C3, Gp6, Vwf, F2rl2, Serpine2, Trem1, Gp9, F5, Pros1, P2ry12, Gp1bb, Plek, Gp5</i>                                                                                                                                                                                                                                                                                                                                                                                                                                                                                                                                                                                                                                                                                                                                                                                                |

|    |         |                                               |          |                |                    |                                                                                                                                                                                                                                                                                                                                                                                                                                                                                                                                                                                                         |
|----|---------|-----------------------------------------------|----------|----------------|--------------------|---------------------------------------------------------------------------------------------------------------------------------------------------------------------------------------------------------------------------------------------------------------------------------------------------------------------------------------------------------------------------------------------------------------------------------------------------------------------------------------------------------------------------------------------------------------------------------------------------------|
| 6  | 0065007 | Biological regulation                         | 3.71E-10 | 84/187 (44.9%) | 7128/33954 (21.0%) | <i>Tsc1, Rgs10, Tmsb4x, Cst3, Ybx1, Psmd4, Ywhah, Fech, Myo6, Map2k2, Atp1f1, Ccng2, Gchfr, Gng11, Cdkn2c, Glrx5, Cela1, C3, Cul4a, Gpx4, Rnf10, Cd81, Sh3bgr13, Csda, Car2, Bcl2l1, Fzr1, Skap2, Dstn, Ctnna1, Prdx3, Ilk, Sytl4, Alox12, Nptn, Gp6, Arhgef3, Vwf, Atox1, Birc2, F2rl2, Serpine2, Sdpr, Itpr2, Ywhaz, Ifi30, Plp1, Prdx5, Ehd4, Fancl, Gnaz, Litaf, Prkar2b, Cux1, Trem1, Lgals3bp, Gp9, Nusap1, F5, Pros1, Ranbp10, P2ry12, Gnas, B2m, Itga6, Cdc42ep5, Cd9, Trim10, Arf5, Gp1bb, Ctla2b, Bin1, Epb4.1, Spnb1, Ptpn11, Agtrap, Slc2a3, G3bp2, Mast2, Epb4.9, Plek, Gp5, E2f2, Vcl</i> |
| 7  | 0042060 | Wound healing                                 | 3.06E-09 | 13/187 (7.0%)  | 143/33954 (0.4%)   | <i>C3, Gp6, Vwf, F2rl2, Serpine2, Trem1, Gp9, F5, Pros1, P2ry12, Gp1bb, Plek, Gp5</i>                                                                                                                                                                                                                                                                                                                                                                                                                                                                                                                   |
| 8  | 0050878 | Regulation of body fluid levels               | 1.01E-08 | 13/187 (7.0%)  | 157/33954 (0.5%)   | <i>C3, Gp6, Vwf, F2rl2, Serpine2, Trem1, Gp9, F5, Pros1, P2ry12, Gp1bb, Plek, Gp5</i>                                                                                                                                                                                                                                                                                                                                                                                                                                                                                                                   |
| 9  | 0071840 | Cellular component organization or biogenesis | 3.22E-08 | 42/187 (22.5%) | 2396/33954 (7.1%)  | <i>Tsc1, Tmsb4x, Ywhah, Fech, Myo6, Hist2h2ac, Ccng2, Gchfr, Hist1h1c, C3, Lyz2, Gpx4, Cd81, Cap1, Bcl2l1, Fzr1, Dstn, Sorl1, Ctnna1, Ilk, Alox12, Nptn, Birc2, Actb, Serpine2, Pf4, Ywhaz, Ehd4, Lyz1, Sort1, Nusap1, Pros1, Ranbp10, Itga6, Cd9, Bin1, Epb4.1, Spnb1, Ptpn11, Epb4.9, Plek, Vcl</i>                                                                                                                                                                                                                                                                                                   |
| 10 | 0006950 | Response to stress                            | 5.03E-08 | 31/187 (16.6%) | 1371/33954 (4.0%)  | <i>Cst3, Psmd4, Chi3l3, Fech, Cela1, C3, Lyz2, Cul4a, Gpx4, Fzr1, Prdx3, Gp6, Vwf, Atox1, Birc2, F2rl2, Serpine2, Ywhaz, Fancl, Lyz1, Trem1, Gp9, F5, Pros1, P2ry12, B2m, Cdc42ep5, Gp1bb, Ptpn11, Plek, Gp5</i>                                                                                                                                                                                                                                                                                                                                                                                        |
| 11 | 0050896 | Response to stimulus                          | 5.20E-08 | 45/187 (24.1%) | 2752/33954 (8.1%)  | <i>Ifi27l2a, Cst3, Ybx1, Psmd4, Chi3l3, Fech, Myo6, S100a8, Cela1, C3, Lyz2, Cul4a, Gpx4, Ifit2, Bcl2l1, Fzr1, Prdx3, Acsl1, Alox12, Gp6, Vwf, Atox1, Birc2, F2rl2, Serpine2, Pf4, Ywhaz, Oasl2, Fancl, Lyz1, Sort1, Prkar2b, Trem1, Gp9, F5, Pros1, P2ry12, Gnas, B2m, Itga6, Cdc42ep5, Gp1bb, Ptpn11, Plek, Gp5</i>                                                                                                                                                                                                                                                                                   |
