# Supplementary material for: Maps of Open Chromatin Guide the Functional Follow-Up of Genome-Wide Association Signals: Application to Hematological Traits
Source: PubMed Central journal article supplement (PMC3128100; doi:10.1371/journal.pgen.1002139), 2011-06-30
Supplement: pgen.1002139.s016.pdf [file pgen.1002139.s016.pdf]

**Table S9. Genetic loci selected for the high-density DNA tiling array.**

| <b>(A) Association loci</b> |                             |                  |             |                      |              |                  |             |             |               |
|-----------------------------|-----------------------------|------------------|-------------|----------------------|--------------|------------------|-------------|-------------|---------------|
| #                           | Gene(s)                     | GWA index SNP(s) |             | Trait(s)             | Reference(s) | Genomic position |             |             | Interval (kb) |
|                             |                             | ID               | Position    |                      |              | Chromosome       | Start       | End         |               |
| 1                           | <i>PCSK9</i>                | rs11206510       | 55,268,627  | Early-onset MI       | [1]          | 1p32.3           | 55,240,000  | 55,300,000  | 60.00         |
| 2                           | <i>VAV3<sup>b</sup></i>     | rs17229705       | 107,940,484 | PLS                  | [2]          | 1p13.3           | 107,890,000 | 108,055,000 | 165.00        |
| 3                           | <i>CELSR2, PSRC1, SORT1</i> | rs599839         | 109,623,689 | CAD                  | [3,4]        | 1p13.3           | 109,489,481 | 109,739,481 | 250.00        |
|                             |                             | rs646776         | 109,620,053 | Early-onset MI       | [1]          |                  |             |             |               |
| 4                           | <i>PEAR1<sup>b</sup></i>    | rs3737224        | 155,146,204 | PLS                  | [2]          | 1q23.1           | 155,100,000 | 155,250,000 | 150.00        |
| 5                           | <i>FCER1G<sup>a,b</sup></i> | rs3557           | 159,455,517 | PLS                  | [2]          | 1q23.3           | 159,441,711 | 159,465,662 | 23.95         |
| 6                           | <i>DNM3</i>                 | rs10914144       | 170,216,373 | MPV                  | [5]          | 1q24.3           | 170,130,000 | 170,390,000 | 260.00        |
| 7                           | <i>TMCC2</i>                | rs1668873        | 203,502,613 | MPV                  | [5]          | 1q32.1           | 203,445,000 | 203,540,000 | 95.00         |
| 8                           | <i>MIA3</i>                 | rs17465637       | 220,890,152 | CAD / early-onset MI | [1,3]        | 1q41             | 220,678,228 | 221,078,228 | 400.00        |
|                             |                             | rs3008621        | 220,870,669 | CAD                  | [4]          |                  |             |             |               |
| 9                           | <i>EHD3</i>                 | rs647316         | 31,318,333  | MPV                  | [5]          | 2p23.1           | 31,305,000  | 31,346,000  | 41.00         |
| 10                          | <i>STK39<sup>b</sup></i>    | rs6749447        | 168,749,632 | SBP / DBP            | [6]          | 2q24.3           | 168,695,000 | 168,800,000 | 105.00        |
|                             |                             | rs3754777        | 168,724,160 |                      |              |                  |             |             |               |
| 11                          | <i>WDR12<sup>a</sup></i>    | rs6725887        | 203,454,130 | Early-onset MI       | [1]          | 2q33.1           | 203,443,575 | 203,494,639 | 51.06         |
| 12                          | <i>gene desert</i>          | rs2943634        | 226,776,324 | CAD                  | [3,4]        | 2q36.3           | 226,532,739 | 226,982,739 | 450.00        |
| 13                          | <i>ITPR1<sup>b</sup></i>    | rs17786144       | 4,804,575   | PLS                  | [2]          | 3p26.2           | 4,760,000   | 4,860,000   | 100.00        |
| 14                          | <i>RAF1<sup>a,b</sup></i>   | rs3729931        | 12,601,516  | PLS                  | [2]          | 3p25.1           | 12,590,108  | 12,690,678  | 100.57        |
| 15                          | <i>ULK4</i>                 | rs9815354        | 41,887,655  | DBP                  | [7,8]        | 3p22.1           | 41,710,000  | 41,970,000  | 260.00        |
| 16                          | <i>ARHGEF3</i>              | rs12485738       | 56,840,816  | MPV                  | [5,9]        | 3p14.3           | 56,750,000  | 56,880,000  | 130.00        |
| 17                          | <i>MRAS</i>                 | rs9818870        | 139,604,812 | CAD / MI             | [10]         | 3q22.3           | 139,550,000 | 139,613,000 | 63.00         |
| 18                          | <i>P2RY12<sup>b</sup></i>   | rs1472122        | 152,517,292 | PLS                  | [2]          | 3q25.1           | 152,410,000 | 152,580,000 | 170.00        |
| 19                          | <i>ITGA2<sup>b</sup></i>    | rs41305896       | 52,311,475  | PLS                  | [2]          | 5q11.2           | 52,267,000  | 52,436,366  | 169.37        |
| 20                          | <i>PHACTR1</i>              | rs12526453       | 13,035,530  | Early-onset MI       | [1]          | 6p24.1           | 12,985,000  | 13,060,000  | 75.00         |

|    |                                               |                                                           |             |                |               |               |             |             |        |
|----|-----------------------------------------------|-----------------------------------------------------------|-------------|----------------|---------------|---------------|-------------|-------------|--------|
| 21 | <i>HFE</i>                                    | rs1800562                                                 | 26,201,120  | MCV            | [5]           | 6p22.1        | 26,190,000  | 26,260,000  | 70.00  |
| 22 | <i>BAK1</i>                                   | rs210135                                                  | 33,648,670  | PLT            | [5]           | 6p21.31       | 33,644,000  | 33,665,000  | 21.00  |
| 23 | <i>MAPK14<sup>b</sup></i>                     | rs851007                                                  | 36,172,014  | PLS            | [2]           | 6p21.31       | 36,050,000  | 36,210,000  | 160.00 |
| 24 | <i>BSYL, CCND3</i>                            | rs11970772                                                | 42,033,268  | MCV            | [5]           | 6p21.1        | 41,985,000  | 42,105,000  | 120.00 |
| 25 | <i>HBS1L, MYB</i>                             | rs9402686                                                 | 135,469,510 | MCV            | [5]           | 6q23.3        | 135,400,000 | 135,582,003 | 182.00 |
| 26 | <i>MTHFD1L</i>                                | rs6922269                                                 | 151,294,678 | CAD            | [3,4,11]      | 6q25.1        | 151,199,579 | 151,399,579 | 200.00 |
| 27 | <i>SLC22A3, LPAL2, LPA</i>                    | rs2048327–rs3127599–<br>rs7767084–rs10755578<br>haplotype |             | CAD            | [12]          | 6q25.3–q26    | 160,780,000 | 161,055,000 | 275.00 |
| 28 | <i>CD36<sup>b</sup></i>                       | rs1049654                                                 | 80,113,391  | PLS            | [2]           | 7q21.11       | 80,045,000  | 80,137,000  | 92.00  |
| 29 | <i>TFR2</i>                                   | rs7385804                                                 | 100,073,906 | RBC            | [5]           | 7q22.1        | 100,050,000 | 100,100,000 | 50.00  |
| 30 | <i>FLJ36031, PIK3CG</i>                       | rs342293                                                  | 106,159,455 | MPV            | [5,13]        | 7q22.3        | 106,085,000 | 106,190,000 | 105.00 |
| 31 | <i>AK3, RCL1, JAK2<sup>(b, for PLS)</sup></i> | rs385893                                                  | 4,753,176   | PLT            | [5]           | 9p24.1        | 4,730,000   | 5,050,000   | 320.00 |
|    |                                               | rs10429491                                                | 5,040,706   | PLS            | [2]           |               |             |             |        |
| 32 | <i>CDKN2A, CDKN2B</i>                         | rs1333049                                                 | 22,115,503  | CAD / MI       | [1,3,4,11,14] | 9p21.3        | 21,900,000  | 22,200,000  | 300.00 |
|    |                                               | rs4977574                                                 | 22,088,574  | Early-onset MI | [1]           |               |             |             |        |
| 33 | <i>CACNB2</i>                                 | rs11014166                                                | 18,748,804  | DBP            | [7,8]         | 10p12.33      | 18,570,000  | 18,840,000  | 270.00 |
| 34 | <i>CXCL12/SDF1</i>                            | rs501120                                                  | 44,073,873  | CAD            | [3,4]         | 10q11.21      | 43,950,000  | 44,200,000  | 250.00 |
|    |                                               | rs1746048                                                 | 44,095,830  | Early-onset MI | [1]           |               |             |             |        |
| 35 | <i>JMJD1C<sup>a</sup></i>                     | rs2393967                                                 | 64,803,162  | MPV            | [5]           | 10q21.2–q21.3 | 64,586,991  | 64,905,728  | 318.74 |
| 36 | <i>CYP17A1, C10orf32</i>                      | rs1004467                                                 | 104,584,497 | SBP            | [7,8]         | 10q24.32      | 104,520,000 | 104,690,000 | 170.00 |
| 37 | <i>BET1L, SIRT3, PSMD13</i>                   | rs11602954                                                | 192,856     | MPV            | [5]           | 11p15.5       | 180,000     | 240,000     | 60.00  |
| 38 | <i>PLEKHA7</i>                                | rs381815                                                  | 16,858,844  | SBP            | [7,8]         | 11p15.1       | 16,795,000  | 16,960,000  | 165.00 |
| 39 | <i>ATP2B1</i>                                 | rs2681492                                                 | 88,537,220  | SBP            | [7,8]         | 12q21.33      | 88,460,000  | 88,650,000  | 190.00 |
|    |                                               | rs2681472                                                 | 88,533,090  | HYP / DBP      | [7,8]         |               |             |             |        |
| 40 | <i>SH2B3/LNK, ATXN2</i>                       | rs3184504                                                 | 110,368,991 | MI; SBP / DBP  | [7,8,15]      | 12q24.12      | 110,310,000 | 110,570,000 | 260.00 |
|    |                                               | rs11065987                                                | 110,556,807 | PLT; CAD / MI  | [5]           |               |             |             |        |
| 41 | <i>PTPN11<sup>a</sup></i>                     | rs11066301                                                | 111,355,755 | PLT; CAD / MI  | [5]           | 12q24.13      | 111,330,919 | 111,442,100 | 111.18 |

|    |                                       |            |             |                 |       |              |             |             |        |
|----|---------------------------------------|------------|-------------|-----------------|-------|--------------|-------------|-------------|--------|
| 42 | <i>TBX3, TBX5</i>                     | rs2384550  | 113,837,114 | DBP             | [7,8] | 12q24.21     | 113,810,000 | 113,930,000 | 120.00 |
| 43 | <i>HNF1A/TCF1, C12orf43</i>           | rs2259816  | 119,919,970 | CAD / MI        | [10]  | 12q24.31     | 119,850,000 | 119,980,000 | 130.00 |
| 44 | <i>WDR66</i>                          | rs7961894  | 120,849,966 | MPV             | [5,9] | 12q24.31     | 120,760,000 | 120,970,000 | 210.00 |
| 45 | <i>TPM1</i>                           | rs11071720 | 61,129,049  | MPV             | [5]   | 15q22.2      | 61,080,000  | 61,160,000  | 80.00  |
| 46 | <i>SMAD3<sup>b</sup></i>              | rs17228212 | 65,245,693  | CAD             | [3]   | 15q22.33–q23 | 65,150,000  | 65,350,000  | 200.00 |
| 47 | <i>CSK, ULK3</i>                      | rs6495122  | 72,912,698  | DBP             | [7,8] | 15q24.1      | 72,810,000  | 73,030,000  | 220.00 |
| 48 | <i>CDH13</i>                          | rs11646213 | 81,200,152  | HYP / SBP / DBP | [16]  | 16q23.3      | 81,190,000  | 81,240,000  | 50.00  |
| 49 | <i>MAP2K4<sup>a,b</sup></i>           | rs41307923 | 11,968,409  | PLS             | [2]   | 17p12        | 11,854,860  | 11,997,776  | 142.92 |
| 50 | <i>TAOK1</i>                          | rs2138852  | 24,727,475  | MPV             | [5,9] | 17q11.2      | 24,680,000  | 24,930,000  | 250.00 |
| 51 | <i>GSDMA, ORMDL3</i>                  | rs17609240 | 35,364,215  | WBC             | [5]   | 17q12        | 35,314,374  | 35,387,545  | 73.17  |
| 52 | <i>CD226</i>                          | rs893001   | 65,667,825  | MPV             | [5]   | 18q22.2      | 65,620,000  | 65,730,000  | 110.00 |
| 53 | <i>MAP2K2<sup>b</sup></i>             | rs350916   | 4,045,775   | PLS             | [2]   | 19p13.3      | 4,025,000   | 4,095,000   | 70.00  |
| 54 | <i>LDLR</i>                           | rs1122608  | 11,024,601  | Early-onset MI  | [1]   | 19p13.2      | 11,010,000  | 11,120,000  | 110.00 |
| 55 | <i>AKT2<sup>b</sup></i>               | rs41275750 | 45,429,935  | PLS             | [2]   | 19q13.2      | 45,380,000  | 45,520,000  | 140.00 |
| 56 | <i>APOC1, APOC4, APOE<sup>b</sup></i> | rs4420638  | 50,114,786  | CAD             | [11]  | 19q13.32     | 50,000,000  | 50,230,000  | 230.00 |
| 57 | <i>GP6<sup>a,b</sup></i>              | rs1613662  | 60,228,407  | PLS             | [2]   | 19q13.42     | 60,206,885  | 60,251,444  | 44.56  |
| 58 | <i>SIRPA</i>                          | rs6136489  | 1,871,734   | MPV             | [5]   | 20p13        | 1,820,000   | 1,950,000   | 130.00 |
| 59 | <i>SLC5A3, MRPS6, KCNE2</i>           | rs9982601  | 34,520,998  | Early-onset MI  | [1]   | 21q22.11     | 34,340,000  | 34,530,000  | 190.00 |
| 60 | <i>GNAZ<sup>b</sup></i>               | rs3788337  | 21,742,017  | PLS             | [2]   | 22q11.22     | 21,720,000  | 21,840,000  | 120.00 |
| 61 | <i>FBXO7</i>                          | rs9609565  | 31,197,528  | MCV             | [5]   | 22q12.3      | 31,186,000  | 31,250,000  | 64.00  |
| 62 | <i>TMPRSS6</i>                        | rs5756506  | 35,797,338  | MCH             | [5]   | 22q12.3      | 35,730,000  | 35,830,000  | 100.00 |

| <b>(B) Lineage-specific reference genes</b> |                 |                         |              |             |                      |
|---------------------------------------------|-----------------|-------------------------|--------------|-------------|----------------------|
| <b>Lineage</b>                              | <b>Gene</b>     | <b>Genomic position</b> |              |             | <b>Interval (kb)</b> |
|                                             |                 | <b>Chromosome</b>       | <b>Start</b> | <b>End</b>  |                      |
| <b>monocytic</b>                            | <i>ASGR2</i>    | 17p13.1                 | 6,943,365    | 6,960,852   | 17.49                |
|                                             | <i>CD163</i>    | 12p13.31                | 7,512,676    | 7,549,681   | 37.01                |
|                                             | <i>FER1L3</i>   | 10q23.33                | 95,054,176   | 95,234,029  | 179.85               |
|                                             | <i>KLF4</i>     | 9q31.2                  | 109,284,956  | 109,293,576 | 8.62                 |
|                                             | <i>PID1</i>     | 2q36.3                  | 229,594,933  | 229,846,301 | 251.37               |
|                                             | <i>RIN2</i>     | 20p11.23                | 19,816,210   | 19,933,100  | 116.89               |
|                                             | <i>SLC46A2</i>  | 9q32                    | 114,679,021  | 114,694,866 | 15.85                |
|                                             | <i>TMEM176A</i> | 7q36.1                  | 150,126,787  | 150,135,141 | 8.35                 |
| <b>erythroblastoid</b>                      | <i>CA1</i>      | 8q21.2                  | 86,425,709   | 86,479,594  | 53.89                |
|                                             | <i>CALB2</i>    | 16q22.3                 | 69,948,127   | 69,983,842  | 35.72                |
|                                             | <i>EPB42</i>    | 15q15.2                 | 41,274,720   | 41,302,773  | 28.05                |
|                                             | <i>ERAF</i>     | 16p11.2                 | 31,444,704   | 31,449,625  | 4.92                 |
|                                             | <i>FAM83A</i>   | 8q24.13                 | 124,261,933  | 124,293,499 | 31.57                |
|                                             | <i>GDF15</i>    | 19p13.11                | 18,355,968   | 18,362,986  | 7.02                 |
|                                             | <i>HBZ</i>      | 16p13.3                 | 140,854      | 146,504     | 5.65                 |
|                                             | <i>LOC51252</i> | 2q11.2                  | 96,903,349   | 96,929,558  | 26.21                |
| <b>megakaryocytic</b>                       | <i>ADCY6</i>    | 12q13.12                | 47,444,248   | 47,471,087  | 26.84                |
|                                             | <i>CMTM5</i>    | 14q11.2                 | 22,913,857   | 22,920,821  | 6.96                 |
|                                             | <i>DDEF2</i>    | 2p25.1                  | 9,262,345    | 9,465,257   | 202.91               |
|                                             | <i>LY6G6D</i>   | 6p21.33                 | 31,789,112   | 31,795,560  | 6.45                 |
|                                             | <i>MEIS1</i>    | 2p14                    | 66,514,036   | 66,655,395  | 141.36               |
|                                             | <i>MYLK</i>     | 3q21.1                  | 124,811,833  | 125,087,839 | 276.01               |
|                                             | <i>NFIB</i>     | 9p23–p22.3              | 14,069,847   | 14,305,945  | 236.10               |
|                                             | <i>SELP</i>     | 1q24.2                  | 167,822,711  | 167,868,001 | 45.29                |

Genomic coordinates are based on the human reference genome, build hg18 (NCBI build 36). **Abbreviations:** CAD: coronary artery disease; MI: myocardial infarction; MPV: mean platelet volume; PLT: platelet counts; PLS: platelet signaling; WBC: white blood cell counts; RBC: red blood cell counts; MCV: mean corpuscular volume of erythrocytes; MCH: mean corpuscular hemoglobin; SBP: systolic blood pressure; DBP: diastolic blood pressure; HYP: hypertension. **Key:** <sup>a</sup>target gene  $\pm$  10 kb; <sup>b</sup>biological evidence for association.

#### References:

1. Myocardial Infarction Genetics Consortium (2009) Genome-wide association of early-onset myocardial infarction with single nucleotide polymorphisms and copy number variants. *Nat Genet* 41: 334-340.

2. Jones CI, Bray S, Garner SF, Stephens J, de Bono B, et al. (2009) A functional genomics approach reveals novel quantitative trait loci associated with platelet signalling pathways. *Blood* 114: 1405-1416.
3. Samani NJ, Erdmann J, Hall AS, Hengstenberg C, Mangino M, et al. (2007) Genome-wide association analysis of coronary artery disease. *New Engl J Med* 357: 443-453.
4. Coronary Artery Disease Consortium (2009) Large scale association analysis of novel genetic loci for coronary artery disease. *Arterioscl Throm Vas Biol* 29: 774-780.
5. Soranzo N, Spector TD, Mangino M, Kühnel B, Rendon A, et al. (2009) A genome-wide meta-analysis identifies 22 loci associated with eight hematological parameters in the HaemGen consortium. *Nat Genet* 41: 1182-1190.
6. Wang Y, O'Connell JR, McArdle PF, Wade JB, Dorff SE, et al. (2009) Whole-genome association study identifies STK39 as a hypertension susceptibility gene. *Proc Natl Acad Sci USA* 106: 226-231.
7. Newton-Cheh C, Johnson T, Gateva V, Tobin MD, Bochud M, et al. (2009) Genome-wide association study identifies eight loci associated with blood pressure. *Nat Genet* 41: 666-676.
8. Levy D, Ehret GB, Rice K, Verwoert GC, Launer LJ, et al. (2009) Genome-wide association study of blood pressure and hypertension. *Nat Genet* 41: 677-687.
9. Meisinger C, Prokisch H, Gieger C, Soranzo N, Mehta D, et al. (2009) A genome-wide association study identifies three loci associated with mean platelet volume. *Am J Hum Genet* 84: 66-71.
10. Erdmann J, Grohennig A, Braund PS, König IR, Hengstenberg C, et al. (2009) New susceptibility locus for coronary artery disease on chromosome 3q22.3. *Nat Genet* 41: 280-282.
11. The Wellcome Trust Case Control Consortium (2007) Genome-wide association study of 14,000 cases of seven common diseases and 3,000 shared controls. *Nature* 447: 661-678.
12. Trégouët D-A, König IR, Erdmann J, Munteanu A, Braund PS, et al. (2009) Genome-wide haplotype association study identifies the SLC22A3-LPAL2-LPA gene cluster as a risk locus for coronary artery disease. *Nat Genet* 41: 283-285.
13. Soranzo N, Rendon A, Gieger C, Jones CI, Watkins NA, et al. (2009) A novel variant on chromosome 7q22.3 associated with mean platelet volume, counts and function. *Blood* 113: 3831-3837.
14. Schunkert H, Götz A, Braund P, McGinnis R, Trégouët D-A, et al. (2008) Repeated replication and a prospective meta-analysis of the association between chromosome 9p21.3 and coronary artery disease. *Circulation* 117: 1675-1684.
15. Gudbjartsson DF, Bjornsdottir US, Halapi E, Helgadottir A, Sulem P, et al. (2009) Sequence variants affecting eosinophil numbers associate with asthma and myocardial infarction. *Nat Genet* 41: 342-347.
16. Org E, Eyheramendy S, Juhanson P, Gieger C, Lichtner P, et al. (2009) Genome-wide scan identifies CDH13 as a novel susceptibility locus contributing to blood pressure determination in two European populations. *Hum Mol Genet* 18: 2288-2296.
